1 **Glycolytic interference blocks influenza A virus propagation by impairing viral**  
2 **polymerase-driven synthesis of genomic vRNA**

3

4 **Authors:** J. Kleinehr<sup>1</sup>, K. Daniel<sup>1</sup>, F. Günl<sup>1</sup>, J. Janowski<sup>1</sup>, L. Brunotte<sup>1</sup>, M. Liebmann<sup>2</sup>, M.  
5 Behrens<sup>3</sup>, A. Gerdemann<sup>3</sup>, L. Klotz<sup>2</sup>, M. Esselen<sup>3</sup>, H.-U. Humpf<sup>3</sup>, S. Ludwig<sup>1\*#</sup>, E. R. Hrinčius<sup>1\*</sup>

6 **Affiliations:**

7 <sup>1</sup> Institute of Virology Muenster (IVM), Westfaelische Wilhelms-University Muenster,  
8 Von-Esmarch-Strasse 56, 48149 Muenster, Germany

9 <sup>2</sup> Department of Neurology with Institute of Translational Neurology, University Hospital  
10 Muenster, Albert-Schweitzer-Campus 1, 48149 Muenster, Germany

11 <sup>3</sup> Institute of Food Chemistry, Westfaelische Wilhelms-University Muenster, Corrensstrasse  
12 45, 48149 Muenster, Germany

13 \* Shared seniorauthorship

14 # **Correspondence:** Univ.-Prof. Dr. rer. nat. Stephan Ludwig, Institute of Virology Muenster,  
15 Von-Esmarch-Straße 56, 48149 Muenster, Germany, tel.: +492518357791, fax:  
16 +492518357793, [ludwigs@uni-muenster.de](mailto:ludwigs@uni-muenster.de)

17 **Running title:** Glycolytic inhibition and influenza A virus replication

18 **Abstract**

19 Influenza A virus (IAV), like any other virus, provokes considerable modifications of its host  
20 cell's metabolism. This includes a substantial increase in the uptake as well as the  
21 metabolization of glucose. Although it is known for quite some time that suppression of glucose  
22 metabolism restricts virus replication, the exact molecular impact on the viral life cycle  
23 remained enigmatic so far. Using 2-deoxy-D-glucose (2-DG) we examined how well inhibition  
24 of glycolysis is tolerated by host cells and which step of the IAV life cycle is affected. We  
25 observed that effects induced by 2-DG are reversible and that cells can cope with relatively  
26 high concentrations of the inhibitor by compensating the loss of glycolytic activity by  
27 upregulating other metabolic pathways. Moreover, mass spectrometry data provided  
28 information on various metabolic modifications induced by either the virus or agents interfering  
29 with glycolysis. In the presence of 2-DG viral titers were significantly reduced in a  
30 dose-dependent manner. The supplementation of direct or indirect glycolysis metabolites led  
31 to a partial or almost complete reversion of the inhibitory effect of 2-DG on viral growth and  
32 demonstrated that indeed the inhibition of glycolysis and not of *N*-linked glycosylation was  
33 responsible for the observed phenotype. Importantly, we could show via conventional and  
34 strand-specific qPCR that the treatment with 2-DG led to a prolonged phase of viral mRNA  
35 synthesis while the accumulation of genomic vRNA was strongly reduced. At the same time,  
36 minigenome assays showed no signs of a general reduction of replicative capacity of the viral  
37 polymerase. Therefore, our data suggest that the significant reduction in IAV replication by  
38 glycolytic interference occurs mainly due to an impairment of the dynamic regulation of the  
39 viral polymerase which conveys the transition of the enzyme's function from transcription to  
40 replication.

41

42 **Author Summary**

43 Upon infection the influenza A virus alters the metabolism of infected cells. Among others, this  
44 includes a pronounced increase in glucose metabolism. We aimed to get a better  
45 understanding of these metabolic virus-host interactions and to unravel the mechanism by  
46 which glycolytic inhibition impairs the viral life cycle. On the one hand, we observed a  
47 virus-induced upregulation of many glycolysis metabolites which could often be reversed by  
48 the administration of a glycolysis inhibitor. On the other hand, our data suggested that the  
49 inhibitor treatment severely impaired viral propagation by interfering with the regulation of the  
50 viral polymerase. This manifested in an extended phase of transcription, while replication was  
51 strongly reduced. Additionally, we assessed the safety and tolerability of the used drug in  
52 immortalized and primary cells. Our study sheds more light on metabolic virus-host interactions  
53 and provides a better understanding of metabolic interference as a potential host-targeted  
54 antiviral approach, which does not bear the risk of creating resistances.

## 55 **1. Introduction**

56 Influenza viruses (IVs) still constitute a major risk factor for the human health all over the globe.  
57 According to extrapolations, 3-5 million severe cases and up to half a million deaths occur on  
58 average during annual IV epidemics [1]. The influenza A virus (IAV) is of special interest since  
59 it has zoonotic and pandemic potential. The high mutation rate of the IV genome easily allows  
60 to develop resistances to antiviral treatments. Therefore, more and more research focuses on  
61 targeting cellular factors, which are indispensable for viral replication, to develop novel  
62 host-targeted antiviral strategies. Since viruses in general are intracellular parasites and thus  
63 have no metabolism on their own, they completely depend on the host cell's metabolism for  
64 their replication. Moreover, each type of virus reshapes the host cell's metabolism towards its  
65 specific needs by regulating – often increasing – the uptake of metabolites and the activity of  
66 certain metabolic pathways [2-6]. Frequently, this includes elevated activity of glycolysis, the  
67 pentose phosphate pathway (PPP), lipid metabolism and the generation of amino acids [3].  
68 This was also demonstrated for IV infections. Altered activity or elevated levels of pathway  
69 intermediates of, among others, glutaminolysis [7-9], fatty acid synthesis (FAS) [7, 9], the PPP  
70 [7, 8], the hexosamine biosynthetic pathway [9] and the tricarboxylic acid (TCA) cycle [7, 8]  
71 were observed. However, especially an increased glycolytic rate and uptake of glucose has  
72 been described in various immortalized and primary cells after infection with IV as well as in  
73 the lungs of infected patients [7, 8, 10]. Direct inhibition of glycolysis or mediators of glycolysis  
74 led to a significant impairment of IV reproduction and spread [7, 11, 12]. Furthermore, the  
75 concentration of extracellular lactate increases during IV infections [8], suggesting the  
76 exploitation of aerobic glycolysis. This is indicative of the Warburg effect [13, 14], in which cells  
77 metabolize glucose rather to lactate instead of pyruvate despite the adequate availability of  
78 oxygen. In this scenario, which is also observed in tumors, cells depend more on glycolysis  
79 than oxidative phosphorylation for sufficient synthesis of adenosine triphosphate (ATP). On  
80 the one hand IV benefits from this by rapidly generating large amounts of biological building  
81 blocks for its replication and on the other hand an increased production of lactate inhibits the  
82 induction of type I interferons [15].

83 In our research we targeted the glucose metabolism with a special focus on the inhibition of  
84 glycolysis with the inhibitor 2-deoxy-D-glucose (2-DG), which has already been demonstrated  
85 to interfere with the formation of new infectious IAV particles [11, 12, 16, 17]. Beside the  
86 competitive inhibition of glucose uptake, 2-DG inhibits the first two glycolytic enzymes  
87 hexokinase (HK) and glucose-6-phosphate isomerase (GPI), the latter being its primary target.  
88 Just like glucose, 2-DG will be phosphorylated at the C6 position by HK to  
89 2-deoxy-D-glucose-6-phosphate (2-DG-6-P). 2-DG-6-P competitively inhibits GPI and cannot  
90 be further metabolized by this enzyme. The increasing concentration of 2-DG-6-P leads to a  
91 feedback that additionally inhibits hexokinase in an allosteric manner [18-22]. Moreover, 2-DG  
92 gets fraudulently incorporated into oligosaccharide chains needed for *N*-linked glycosylation of  
93 glycoproteins [23], partially preventing this post-translational modification [24] and hence  
94 affecting the proteins' folding and their functions. This inhibition is mainly conveyed by  
95 guanosine diphosphate (GDP)-2-DG into which 2-DG can be converted [25]. Thereby, 2-DG  
96 evidentially inhibits glycolysis and interferes with *N*-linked glycosylation. Here, we demonstrate  
97 the inhibitor's significant impact on the replication of IAV without causing irreversible damage  
98 to the host cells. Furthermore, we unraveled a major mechanism by which this treatment  
99 interferes with the viral life cycle and discuss the potential of metabolic interference to fight  
100 severe IAV infections.

101

## 102 **2. Results**

### 103 **2-DG is well tolerated in cells and exhibits strong virus-restricting activity**

104 Our first aim was to prove the virus-restricting potential of 2-DG in cell culture. First, we showed  
105 in plaque assays that the number of newly produced infectious IAV particles decreased  
106 significantly in a dose-dependent manner when 2-DG was applied directly after the infection  
107 of A549 cells (**Fig 1A**). This decrease became as strong as more than four orders of magnitude  
108 when the glucose/2-DG ratio was 1:1. Second, we observed a very similar 2-DG-mediated  
109 decrease for IAV nucleoprotein (NP)-positive cells via flow cytometry (**Fig S1A**). These data  
110 demonstrated the strong impairment of IAV reproduction and spread in the presence of 2-DG.

111 Next, we assessed the reversibility as well as metabolic and potential cytotoxic effects of the  
112 2-DG treatment on cells. Here, it could be demonstrated that the strong antiviral effect of a  
113 24 h treatment was quickly abolished once the inhibitor was removed (**Fig 1B**). The massive  
114 increase of viral titers after the replacement of 2-DG with inhibitor-free medium suggested the  
115 full reversibility of 2-DG-induced effects and indicated that there was no permanent cell  
116 damage which is also substantiated by the literature [11]. By performing lactate  
117 dehydrogenase (LDH) assays we detected no cytotoxicity within the range of used 2-DG  
118 concentrations (**Fig 1C**), as previously demonstrated in various cell lines including A549 [26,  
119 27]. Moreover, we could even observe a beneficial effect of the 2-DG treatment for the survival  
120 of infected cells. With increasing 2-DG concentrations the total percentage of dead cells  
121 decreased significantly 24 hours post infection (hpi) (**Fig S1B**). However, the results of the  
122 LDH assays in combination with data obtained from trypan blue exclusions suggested a certain  
123 cytostatic effect, since even though the viability of all samples was not affected, total cell counts  
124 decreased with rising 2-DG concentrations (**Fig S1C+D**). In line with these results, a cytostatic  
125 effect of 2-DG has also been observed previously in other cells [27-29]. Furthermore, we  
126 investigated the effect of 2-DG on the metabolism in real-time via a Seahorse Analyzer. We  
127 observed a very rapid and significant reduction of the glycolytic proton efflux rate (glycoPER),  
128 which constitutes a direct read-out of the glycolytic rate (**Fig 1D**). Since a major factor to  
129 calculate the glycoPER is the extracellular acidification rate (ECAR), this decreased in a similar  
130 pattern as the glycoPER (**Fig 1E**). Simultaneously, the oxygen consumption rate (OCR) of  
131 2-DG-treated cells increased quickly after the beginning of the treatment (**Fig 1F**). These data  
132 proved the partial inhibition of glycolysis by 2-DG in a dose-dependent manner and indicated  
133 that cells were able to cope with the treatment by compensating the loss of glycolytic activity  
134 by upregulating cellular respiration to generate energy.

135 In addition to evaluating the cytotoxicity of 2-DG, we also tested potential effects of 2-DG on  
136 the innate immune response and the cellular responsiveness to viral infections. For that  
137 purpose, we measured expression levels of the proinflammatory genes *interleukin-6* (*IL-6*) and  
138 *C-X-C motif chemokine ligand 8* (*CXCL8*, protein: IL-8) as well as the interferon-stimulated

139 genes (ISGs) *DExD/H-box helicase 58 (DDX58, protein: retinoic acid inducible gene I)* and  
140 *myxovirus resistance gene A (MxA)* after stimulation with either cellular or viral RNA in the  
141 presence or absence of 2-DG (**Fig S1E-H**). We observed a mild to more pronounced induction  
142 of *IL-6* (**Fig S1E**) and *CXCL8* (**Fig S1F**) with increasing concentrations of 2-DG. This finding  
143 was consistent with a previous publication, reporting that nutrient shortage (also induced by  
144 2-DG) triggers a cell response which resembles wound healing processes in cancer cells as  
145 well as in primary cells [26]. Moreover, the mild induction of proinflammatory cytokines in the  
146 presence of 2-DG might be attributed to the fact that the inhibitor can also impair glycosylation.  
147 This in turn gives rise to endoplasmic reticulum (ER) stress, elicited by deficient glycoproteins,  
148 consequently leading to the unfolded protein response (UPR) [23] which has been  
149 demonstrated to drive the production of proinflammatory cytokines [30]. On the other hand, we  
150 measured no clear differences in the expression of *DDX58* (**Fig S1G**) and *MxA* (**Fig S1H**) in  
151 the presence of lower 2-DG concentrations but a moderate and significant reduction of both  
152 ISGs at 25 mM of the inhibitor, when stimulated with viral RNA. Nevertheless, our data  
153 confirmed that the cells were well responsive to viral stimuli, regardless of the concentration of  
154 2-DG that was applied.

155 Apart from the permanent cell line A549, key experiments were repeated in primary human  
156 bronchial epithelial cells (HBEpCs) and genuine human lung explants (**Fig S2A-E**). Since the  
157 used media for primary tissue contained less glucose, lower concentrations of the inhibitor  
158 were used. However, we still applied the same 2-DG/glucose ratio to human lung explants as  
159 in A549 experiments which led to a significant and dose-dependent reduction of viral titers (**Fig**  
160 **S2A**). Because HBEpCs were more susceptible to the treatment, lower 2-DG/glucose ratios  
161 were applied. The highest concentration used in HBEpC experiments was 1200  $\mu$ M which  
162 corresponds to the 2-DG/glucose ratio (1:5) of 5 mM 2-DG in experiments carried out with  
163 A549 cells. Similar to A549 cells, HBEpCs displayed barely any signs of cytotoxicity after  
164 treatment (**Fig S2B**). Reduced lactate concentrations in the supernatant of treated cells  
165 indirectly indicated the efficiency of glycolytic inhibition (**Fig S2C**). Importantly, the treatment  
166 with 2-DG also led to a significant and dose-dependent reduction of viral titers in HBEpCs (**Fig**

167 **S2D+E**). Even though the magnitude of the inhibitory effect on glycolysis and viral replication  
168 differed slightly from the data obtained with A549 cells – most likely due to distinct cellular  
169 metabolic activities and lower 2-DG/glucose ratios (HBEpC) – these data suggested the save  
170 use and antiviral activity of 2-DG in primary tissue.

171

## 172 **2-DG only moderately affects viral protein translation in a single viral life cycle**

173 Given the remarkable impairment of IAV replication by 2-DG, we now aimed to identify the spot  
174 of interference of the drug within the viral life cycle. Therefore, we checked potential changes  
175 in the accumulation of various IAV proteins 24 hpi (**Fig 2A**) and after a single replication cycle  
176 of 8 h (**Fig 2B**). In accordance with the strongly reduced viral titers there was also a  
177 pronounced reduction of viral protein accumulation after 24 h. However, within a single  
178 replication cycle we only detected rather weak differences among the accumulation of viral  
179 proteins. While the accumulation of the late viral proteins polymerase acidic protein (PA) and  
180 matrix protein 1 (M1) was moderately reduced, the accumulation of the early proteins NP and  
181 non-structural protein 1 (NS1) was barely affected by 2-DG. Consequently, even though there  
182 was a moderate reduction of some viral proteins within a single replication cycle we did not  
183 consider reduced viral protein accumulation to be the main reason for the severe impact of  
184 2-DG on IAV propagation.

185 To rule out a general effect on the cellular protein synthesis machinery, we measured the  
186 fluorescence signal of the reporter *Renilla* luciferase driven by a constitutive promoter in a  
187 luciferase assay in the absence or presence of various concentrations of 2-DG (**Fig 2C**).  
188 Decreased signals would be an indication for an impairment of cellular transcription and/or  
189 translation. Interestingly, there was no negative effect on the luciferase signal, suggesting no  
190 general impairment of the cellular protein synthesis. Quite the opposite was the case when  
191 high concentrations of 2-DG were used which even led to an increase of the luciferase signal.

192

193 **Glycolytic interference prolongs the phase of viral transcription while it clearly reduces**  
194 **viral replication within a replication cycle**



195 After disproving viral protein expression being notably hampered by 2-DG, we delved deeper  
196 into the IAV replication cycle to understand the virus-restricting properties of 2-DG. Therefore,  
197 we now examined if a treatment with 2-DG interfered with the main processes driven by the  
198 viral polymerase: transcription and replication. Since IAV is a negative-sense RNA virus its  
199 RNA-dependent RNA polymerase can, right after reaching the host cell's nucleus, transcribe  
200 positive-sense mRNA. After translation and nuclear import, nascent viral polymerase  
201 complexes mediate the two-step process of replication. Here, a positive-sense, full-length  
202 complementary RNA (cRNA) is synthesized from the initial viral genomic RNA (vRNA) which  
203 subsequently serves as a template for vRNA synthesis [31, 32].

204 We analyzed the accumulation of viral mRNA and vRNA that codes for M1. In case of vRNA  
205 detection, the values of M1 are representative of segment 7 (M). As before, M1 mRNA and  
206 vRNA were analyzed after 24 h (**Fig 3A+B**) and after a single replication cycle of 8 h (**Fig**  
207 **3C+D**) with and without 2-DG. As observed for viral proteins, we measured a massive  
208 reduction of M1 mRNA and vRNA 24 hpi when 2-DG was applied (**Fig 3A+B**), which is in line  
209 with the reduction of viral titers. Experiments for the duration of a single replication cycle,  
210 however, revealed intriguing differences between the two distinct RNA species. While viral  
211 mRNA levels were elevated in the presence of 2-DG (**Fig 3C**) the amount of vRNA was clearly  
212 reduced after an infection period of 8 h (**Fig 3D**). Again, these experiments were repeated with  
213 HBEpCs to see if there are similar effects in non-transformed cells with no altered metabolism  
214 (**Fig S2F-I**). Using these primary cells, we observed a very similar pattern of IAV mRNA and  
215 vRNA accumulation through the treatment with 2-DG as in A549 cells. While mRNA was  
216 decreased 24 hpi (**Fig S2F**) and unaffected 8 hpi (**Fig S2G**), vRNA was decreased at both time  
217 points (**Fig S2H+I**). The difference in mRNA accumulation 8 hpi might be due to a milder 2-DG  
218 treatment or could be a cell-specific effect. Nevertheless, the strong reduction in vRNA  
219 accumulation, limiting viral propagation, seemed to be tissue-independent.

220 With this phenotype at hand, we wanted to exclude a virus strain-specific effect and additionally  
221 analyzed the influence of 2-DG on viral growth, transcription, and replication of the H3N2 strain  
222 A/Panama/2007/1999 (Pan/99). As for SC35M, we observed a strong dose-dependent

223 decrease of viral titers, mRNA and vRNA 24 hpi (**Fig S3A-C**). Importantly, with an increase of  
224 Pan/99 mRNA and a decrease of vRNA in a single cycle experiment (**Fig S3D+E**) the results  
225 resembled those obtained with SC35M. Therefore, glycolytic interference on IAV appears to  
226 be a general phenomenon and not a virus strain-specific effect.

227 Summing up the obtained insights, the qPCR data suggested that the main cause for the  
228 impairment of IAV reproduction and spread by 2-DG is the interference of the inhibitor with the  
229 production of viral genome copies. Hereafter, we were especially interested in why glycolytic  
230 inhibition increased viral mRNA but decreased vRNA within a single viral life cycle.

231 In order to shed light on this question we performed an 8 h infection kinetic and analyzed the  
232 synthesis of M1 mRNA and vRNA in the presence of 2-DG in comparison to an untreated  
233 control (**Fig 4A+B**). In untreated cells the production of viral mRNA reached its strongest  
234 incline at approximately 6 hpi and started to establish a plateau afterwards (**Fig 4A**, black line).

235 In contrast, the treatment with 2-DG led to a continuous increase of mRNA transcription,  
236 exceeding the total accumulation of viral mRNA in untreated cells (**Fig 4A**, gray line). Thus,  
237 despite a lower accumulation rate of viral mRNA in treated cells in the first 6 h of an infection,  
238 these samples displayed higher mRNA levels at time points later than 7 hpi. Even though the

239 underlying mechanisms are unknown this observation explained why we detected higher viral  
240 mRNA levels in 2-DG-treated cells after one replication cycle (**Fig 3C**). In accordance with our

241 previous data on vRNA accumulation at 8 hpi (**Fig 3D**), the kinetic revealed that vRNA  
242 accumulated at a clearly reduced rate when 2-DG was applied throughout the whole  
243 experiment (**Fig 4B**, gray line). To verify our results, we performed strand-specific real-time

244 qPCR according to the protocol established by Kawakami *et al.* [33] for segment 5 (NP) and 6  
245 (NA). Additionally, we analyzed segment 1 (PB2), which is the longest of the IAV gene  
246 segments, to rule out effects which might be caused by the length of different segments. We

247 determined the n-fold of viral mRNA and vRNA of the three segments in 2-DG-treated cells  
248 8 hpi in comparison to untreated cells. The results for all three gene segments were very similar  
249 and supported the previous kinetics. We observed a 3-4-fold increase of viral mRNA (**Fig**

250 **4C-E**) while the vRNA of the same gene segments was decreased by approximately 80-90%

251 **(Fig 4F-H)** when 2-DG was applied. Notably, these findings confirmed our previous  
252 measurements of mRNA and vRNA after one replication cycle (**Fig 3C+D**). The data presented  
253 in **Fig 4** indicated that glycolytic inhibition by 2-DG prolonged the phase of viral mRNA  
254 transcription while it attenuated viral genome replication. This suggested either a distinct effect  
255 on the transcriptional and replicative capacity of the viral polymerase or an impairment of the  
256 dynamic regulation of the polymerase function, determining whether it performs transcription  
257 or replication.

258

### 259 **2-DG treatment does not affect the replicative capacity of the viral polymerase nor the** 260 **durability of vRNA**

261 After revealing that reduced vRNA accumulation in the presence of 2-DG was the most crucial  
262 consequence of glycolytic interference for viral growth, we wanted to understand this  
263 phenomenon more mechanistically. Minigenome systems can be used to explicitly focus on  
264 transcription and replication without the dynamic of a full-fledged infection and hence allow to  
265 dissect distinct steps of the viral life cycle to a certain degree. Here, minigenome assays were  
266 performed as described previously [34] to assess whether 2-DG has a direct influence on the  
267 activity of the viral polymerase. For this purpose, we transfected HEK293T cells with plasmids  
268 encoding all proteins of the viral ribonucleoprotein (vRNP) complex – PA, PB1, PB2 and NP –  
269 together with a reporter plasmid coding for a firefly luciferase under the control of a viral  
270 promoter. Another plasmid that constitutively expressed *Renilla* luciferase was co-transfected  
271 to serve as a transfection control. Subsequently, those cells were mock-treated or treated with  
272 2-DG and analyzed via luciferase assay. By transfecting two different expression plasmids of  
273 the firefly reporter luciferase either vRNA-like or cRNA-like RNA templates were synthesized,  
274 which were converted by the transfected and nascent viral proteins. Thus, we were able to  
275 analyze the effect of 2-DG on the transcriptional capacity of the viral polymerase (**Fig 5A**) or a  
276 potential effect on the replicational capacity of the polymerase since vRNA first had to be  
277 synthesized from the cRNA-like template (**Fig 5B**). We observed that transcription was  
278 significantly reduced in the presence of 2-DG (**Fig 5A**) which confirms the previously seen

279 2-DG-induced lower accumulation rate of viral mRNA in the earlier phase of the 8 h kinetic  
280 (**Fig 4A**). On the other hand, there was no significant difference of the luciferase signal  
281 between the various samples when the cRNA plasmid was transfected (**Fig 5B**). Even though  
282 the interpretation here is less straightforward, since the transcription of vRNA in mRNA was  
283 also included in this process, this suggested no reduction of the replicational capacity of the  
284 viral polymerase by 2-DG.

285 Additionally, we examined whether the 2-DG treatment potentially affected the durability (e.g.,  
286 altered stability or rate of degradation) of RNP complexes and performed an assay based on  
287 a previous publication [35] in which HEK293T cells were pre-transfected with plasmids  
288 encoding all RNP complex proteins. 24 h later they were infected with IAV and subsequently  
289 treated with 2-DG and cycloheximide, an inhibitor of translation, for 6 h. This way, the  
290 pre-transfected RNP proteins were synthesized and, after IAV infection, formed RNP  
291 complexes with the nascent cRNA and vRNA. Strand-specific real-time qPCR revealed that  
292 levels of vRNA remained equal between the solvent control and 2-DG-treated samples (**Fig**  
293 **S4**), which indicated no effect of 2-DG on the durability of vRNP complexes.

294 The data presented in the last two chapters suggested that 2-DG mainly impaired IAV  
295 replication and spread by interfering with viral genome replication which was marked by  
296 massively reduced levels of vRNA if the inhibitor was applied. However, 2-DG neither had a  
297 direct effect on the replicative capacity of the viral polymerase (**Fig 5B**) nor on the durability of  
298 vRNP complexes (**Fig S4**).

299

### 300 **IAV infections and glycolytic interference alter the metabolic profile of A549 cells**

301 Given the fact that viral infections affect the cellular metabolism and after revealing that the  
302 IAV life cycle is mainly impaired on the level of vRNA synthesis by glycolytic interference, we  
303 wanted to get a more comprehensive understanding of metabolic alterations induced by the  
304 virus and by a treatment with 2-DG. As we know from the literature [7-9], an IAV infection has  
305 profound impacts on the host's metabolism which especially applies to the glucose  
306 metabolism. Since IAV upregulates the glucose metabolism and 2-DG inhibits glycolysis, we

307 expected a (partial) reversion of virus-induced metabolic changes through the inhibitor.  
308 Moreover, we were interested in metabolic changes aside from glycolysis. Via hydrophilic  
309 interaction liquid chromatography (HILIC) coupled to tandem mass spectrometry (MS/MS), as  
310 described previously [36], we analyzed major alterations of the metabolic profile of A549 cells,  
311 induced by IAV infection and/or the treatment with 2-DG after 24 h (**Fig 6**).

312 In accordance with the literature [7, 8, 10], the levels of glucose and most detected glycolysis  
313 intermediates were increased in infected cells, pointing towards an increase of the uptake of  
314 glucose and the rate of glycolytic activity. When 2-DG was applied, several glycolytic  
315 intermediates (e.g., glucose-6-phosphate (G-6-P) or F-6-P) were detected at decreased  
316 concentrations in both, infected and uninfected cells. Counterintuitively, the amount of lactate  
317 was decreased in infected cells, which may be explained by an increased efflux upon infection  
318 [7, 8] or its metabolization into other intermediates. Independent of an infection, the treatment  
319 with 2-DG clearly decreased intracellular lactate. Altogether our data confirmed a  
320 virus-mediated upregulation of glycolysis as well as its downregulation in the presence of  
321 2-DG. In combination with our previous data this strengthens the position of metabolic  
322 inhibitors as effective antivirals by counteracting virus-induced alterations of the host  
323 metabolism.

324 Other metabolic pathways which are closely connected to glycolysis, such as the PPP or the  
325 TCA cycle, revealed some fascinating changes induced by 2-DG treatment or an IAV infection.  
326 Among all analyzed metabolites 6-phosphogluconate (6-PG) exhibited the strongest increase  
327 upon infection (> 8-fold). The supplementation of 2-DG increased 6-PG concentrations in  
328 uninfected and infected cells. This suggested a strong redirection of G-6-P towards the PPP  
329 which was probably actively induced by the virus or by the inhibition of GPI by 2-DG. It seems  
330 that the oxidative branch of the PPP and thus the direct oxidation of glucose is upregulated  
331 upon IAV infection. Similar results have been obtained previously in chicken embryo cells [10].  
332 However, the profiles of detectable downstream intermediates of the non-oxidative PPP  
333 differed from each other and were therefore difficult to interpret.

334 Most of the detected TCA cycle intermediates decreased upon inhibition of glycolysis  
335 (abolishment of the anaplerotic function of glycolysis) and during infection. The concentration  
336 of acetyl coenzyme A (acetyl-CoA), the linking intermediate between glycolysis and the TCA  
337 cycle, was increased in uninfected cells in the presence of 2-DG. But the highest increase of  
338 acetyl-CoA was found in untreated but infected cells. Apparently, IAV infections promote the  
339 production of large quantities of the important coenzyme.

340 Among amino acids we observed, with only a few exceptions (arginine, lysine and  
341 *N*-acetylaspartate), that most of them were decreased during infection. But, while 2-DG led to  
342 a decrease of approximately half of the analyzed amino acids it also induced a moderate  
343 increase of the other amino acids, independent of an infection. Besides, we noticed that  
344 ketogenic or partly ketogenic amino acids were barely or not reduced by 2-DG. Ketogenic  
345 amino acids can be catabolized into keto bodies (mostly TCA cycle intermediates such as  
346 acetyl-CoA, succinyl-CoA, or fumarate). The amino acids with most severely reduced  
347 concentrations after 2-DG treatment all belonged to the group of glucogenic amino acids,  
348 which means they can be catabolized into glucose through gluconeogenesis. In favor of this,  
349 we also found slightly increased concentrations of pyridoxine (vitamin B6), which is a co-factor  
350 for transaminase reactions which convert amino acids into substrates for gluconeogenesis [37,  
351 38]. The inhibition of glycolysis by 2-DG feigned the deprivation of glucose and hence  
352 mimicked starvation. Probably this triggered cells to catabolize more glucogenic amino acids.  
353 Furthermore, we observed a disturbance of the glutathione equilibrium, one of the most  
354 important antioxidant factors for cellular redox homeostasis. In line with this finding, the  
355 disruption of glutathione and consequentially the redox homeostasis, as an important factor  
356 for IAV pathogenicity, was described before [39-41].

357 The effect of an IAV infection and especially of 2-DG on many nucleobase-related metabolites  
358 (e.g., nucleobases, nucleosides and coenzymes with related structures) was rather mild.  
359 Despite the virus-mediated increase in glycolysis, just like Ritter *et al.* reported [8], we  
360 observed no significant alteration of ATP levels 24 hpi. Even though to a mild extent, the  
361 treatment with 2-DG had the expected effect on intracellular ATP in uninfected cells: 2-DG led

362 to an ATP decrease via inhibition of glycolysis (which even consumes ATP upstream of the  
363 inhibition of GPI through the ATP-driven phosphorylation of 2-DG to 2-DG-6-P). The increase  
364 of adenosine monophosphate (AMP) in the presence of 2-DG is supported by previous  
365 publications reporting of the activation of AMP-activated protein kinase (AMPK) after glycolytic  
366 inhibition, which is triggered by a low ATP/AMP ratio [22]. One of the most striking increases  
367 upon infection was the 6-fold increase of xanthine which was abolished if 2-DG was  
368 administered to infected cells. Despite the decrease of oxidized glutathione (GSSG), the  
369 virus-induced increase of xanthine might be linked to the generation of reactive oxygen species  
370 (ROS, in this case superoxide) which is an important factor for IAV pathogenicity and  
371 proliferation [42]. The catabolism of adenosine generates, among others, xanthine which in  
372 turn is a substrate for xanthine oxidase to generate superoxide [43]. In this light, a high  
373 catabolic rate of adenosine to generate xanthine during IAV infections may explain the low and  
374 high concentration of adenosine and xanthine, respectively, in infected but untreated cells.  
375 Among miscellaneous metabolites we found three candidates which were distinctly affected.  
376 The first one is carnitine which is important for the mitochondrial shuttle of fatty acids for  
377  $\beta$ -oxidation and thus the lipid metabolism. Interestingly, in infected but untreated cells carnitine  
378 was heavily decreased, suggesting a potential alteration of the lipid metabolism, which was  
379 earlier demonstrated in IBV-infected mice [44]. By inhibiting  $\beta$ -oxidation, the virus increases  
380 the pool of lipids which can be utilized for the viral envelope, biosynthesis and transport  
381 purposes. The other two striking metabolites were creatine and phosphocreatine which were  
382 moderately reduced upon IAV infection but heavily reduced in the presence of 2-DG. A main  
383 task of these molecules is the conversion of ADP into ATP to sustain energy levels. The strong  
384 downregulation of creatine and phosphocreatine might have correlated with the conspicuously  
385 mild impact of IAV and 2-DG on ATP concentrations by depleting creatine/phosphocreatine  
386 pools in order to maintain sufficient ATP levels.  
387 All described measurements so far aimed to better understand IAV and 2-DG-induced  
388 metabolic alterations. However, beside these effects, we also analyzed samples which were  
389 additionally supplied with mannose, a C2 epimer of glucose. Since mannose can be converted

390 into fructose-6-phosphate (F-6-P) it should be able to bypass the inhibition by 2-DG to refuel  
391 glycolysis. Hence, we expected mannose to reverse some 2-DG-induced effects. Importantly,  
392 we observed this reversion, sometimes even followed by an increase, for several glycolytic  
393 intermediates (e.g., G-1-P, G-6-P and F-6-P) which demonstrated the antagonistic effect of  
394 mannose against glycolytic inhibition by 2-DG. The reduction of ATP in uninfected cells was  
395 reversed by mannose, too. However, mannose did not always reverse up-/downregulations of  
396 metabolites triggered by 2-DG. For instance, mannose could not or barely reverse the  
397 2-DG-induced decreases of TCA cycle intermediates or alterations among PPP metabolites.  
398 Altogether, it seemed that the most pronounced reversions of 2-DG-mediated alterations on  
399 the metabolism by mannose took place among intermediates of the glucose metabolism and  
400 certain amino acids. Nevertheless, the supplementation of mannose sometimes affected  
401 metabolites apart from reversing 2-DG-mediated alterations.

402 Taken together, these data showed how diversely metabolic pathways are modified during IAV  
403 infections and that even metabolites from the same pathway may be affected in different  
404 manners. Furthermore, the complex connectivity between pathways or single metabolites  
405 became obvious once again. In the context of IAV infections it additionally suggested the  
406 potential of glycolytic interference to counteract IAV-induced metabolic changes as well as a  
407 function for mannose to regulate 2-DG-mediated effects.

408

#### 409 **Mannose circumvents the virus-restricting effect of 2-DG by refueling glycolysis**

410 As described before, glycolysis is closely linked to various other metabolic pathways and its  
411 level of activity, as seen in **Fig 6**, can have a strong impact on the abundance of other  
412 metabolites. As shown in **Fig 7A** a very close connection exists to the mannose metabolism  
413 since F-6-P from glycolysis and mannose-6-phosphate can be converted into each other by  
414 the enzyme mannose-6-phosphate isomerase (MPI). Therefore, glucose and mannose should  
415 be able to substitute each other for many of their purposes inside a cell, which would also  
416 explain some results of the metabolomic data (**Fig 6**). Indeed, the vast majority of mannose is  
417 usually shunted to glycolysis to be catabolized. The remaining mannose is mainly utilized for



418 *N*-linked glycosylation [45]. Due to the close connection of glycolysis and *N*-linked  
419 glycosylation and since others reported that the antiviral effect of 2-DG originated from the  
420 impairment of glycosylation [25, 46] rather than glycolytic inhibition, we aimed to dissect the  
421 interplay of these two hexoses in the context of IAV infections and the virus-restricting effects  
422 of 2-DG. Since previous publications have shown that 2-DG reduced IAV glycoprotein  
423 synthesis [24, 47] and that in general the inhibition of glycosylation by 2-DG could be reversed  
424 by low doses of mannose [16, 48], we supplied 2-DG-treated cells with mannose to see if this  
425 would reverse the inhibition of viral growth in our cell culture model as well (**Fig S5A**). Indeed,  
426 low concentrations of mannose restored viral titers almost completely. We observed this  
427 abolishment of the inhibitory function of 2-DG until a 1:10 ratio between mannose (1 mM) and  
428 2-DG (10 mM). To elucidate if the reversal of inhibition can be attributed to mannose being  
429 catabolized via glycolysis or being utilized for *N*-linked glycosylation we used the MPI inhibitor  
430 MLS0315771 (MLS) to disrupt the link between these two pathways [49]. First, we determined  
431 a safe dosage of the inhibitor including potential effects on cell growth, glycolysis, and the  
432 formation of infective viral particles. We observed no significant effect on cell proliferation and  
433 cell viability but an increase of lactate in the medium in the presence of 50  $\mu$ M MLS, indicating  
434 the safe use of the indicated concentrations and a higher glycolytic rate when the inhibitor is  
435 applied (**Fig S5B-D**). The latter can be explained by the fact that MLS prevents the redirection  
436 of F-6-P to *N*-linked glycosylation. Therefore, more glucose will be catabolized into lactate via  
437 glycolysis. Besides, we observed no significant effect on the production of viral particles (**Fig**  
438 **S5E**). Subsequently, we applied MLS to infected cells which were also treated with 2-DG and  
439 mannose (**Fig 7B**). We saw the typical reduction of viral titers when 2-DG alone was applied  
440 and the restoration of titers via the addition of mannose. Increasing concentrations of MLS  
441 decreased viral titers back to the level of 2-DG-treated samples which suggested that mannose  
442 restored IAV propagation mainly by driving glycolysis and not *N*-linked glycosylation.  
443 Furthermore, it also confirmed that the inhibition of glycolysis was indeed the primary antiviral  
444 mode of action of 2-DG. This got substantiated by the fact that the addition of pyruvate, the  
445 final product of glycolysis under physiological conditions, partially restored viral titers after

446 inhibition by 2-DG (**Fig S5F**). To finally confirm the concept of the glycolytic rate as a  
447 determinant of IAV replication, we examined the effects of 2-DG, mannose, and MLS on the  
448 RNA levels of IAV after a single replication cycle of 8 h. The pattern of M1 vRNA accumulation  
449 (**Fig 7C**) strikingly resembled the pattern of viral titers (**Fig 7B**). The treatment with 2-DG led  
450 to a highly significant reduction of vRNA which was almost completely restored to the control  
451 value by supplementation of mannose. The additional administration of MLS, however,  
452 decreased the vRNA value to a similar extent as 2-DG alone did. Regarding viral mRNA  
453 accumulation (**Fig 7D**) we observed the typical slight increase after treatment with 2-DG, but  
454 barely a return to the control value when mannose was added as well. This only happened  
455 when also MLS was supplemented.

456 Summarizing, these data corroborated that the antiviral activity of 2-DG mainly derived from a  
457 strong impairment of the synthesis of viral genomic RNA by reducing the glycolytic rate of  
458 infected host cells. Moreover, by directly or indirectly inhibiting or fueling glycolysis we found  
459 a way to turn viral reproduction on and off to a certain degree.

### 460 461 **3. Discussion**

462 Understanding the diverse interplay between the host cell metabolism and viral intruders is of  
463 importance since it may create potential new strategies to counteract viral infections. In our  
464 study we were able to improve our comprehension of metabolic virus-host interactions as well  
465 as the mode of action of glycolytic interference on the life cycle of IAV. We observed profound  
466 changes of the whole metabolic profile of infected cells (**Fig 6**), including especially  
467 upregulated amounts of many intermediates of glycolysis. By applying 2-DG, a potent inhibitor  
468 of glycolysis, many virus-induced metabolic alterations could be reversed which indicated the  
469 inhibitor's counteraction against viral manipulations of the host. Furthermore, we showed the  
470 severe impact of glycolytic interference by 2-DG on the propagation of IAV *in vitro* (**Fig**  
471 **1A+S1A**). The reduction of virus titers reached up to 4.5 orders of magnitude and hence was  
472 similar or even exceeded the effectivity of other antiviral compounds [50, 51].

473 During our search for the point of interference within the viral life cycle we deduced that viral  
474 protein synthesis played a subordinate role, because protein accumulation was rather mildly

475 affected within one replication cycle (**Fig 2B**). Interestingly, we did not at all observe a decrease  
476 in cellular protein accumulation after a 2-DG treatment, shown by steady signals of the cellular  
477 control protein in our western blots and via *Renilla* luciferase reporter assay (**Fig 2**). This may  
478 be indicative of a more selective effect which rather applies to viral than cellular protein  
479 translation. According to the data of **Fig 4** and **5** we assume that the predominant mechanism  
480 which is responsible for the strong reduction of IAV multiplication is a 2-DG-mediated  
481 interference with the dynamic regulation that switches the viral polymerase from a  
482 transcriptase to a replicase. Even though one hypothesis proposed that viral transcription and  
483 replication are stochastic without a switch mechanism [35] many studies suggest the opposite.  
484 The switch process of the polymerase is still not fully understood and is probably a  
485 multifactorial process determined by several viral and host factors (summarized in [31]). NP  
486 seems to be one of the key factors in this context and was shown to have a stimulatory function  
487 on viral polymerase activity via a direct interaction with it [52-55]. Additionally, NS1 and nuclear  
488 export protein (NEP, also known as NS2) are presumably implicated in viral replication [56-  
489 58]. Furthermore, small viral RNAs (svRNAs), which resemble the 5' end of vRNAs, have been  
490 linked to the regulation of viral replication [59-62]. It's been hypothesized that the role of  
491 svRNAs in viral replication is the association with a second and trans-acting polymerase which  
492 binds the 5' end of newly synthesized vRNA [31]. Even though it once was postulated that host  
493 factors are not required to initiate viral replication [54], many candidates that can associate  
494 with vRNP components [31, 55, 63-66] and thereby potentially influence the process, such as  
495 the recently described acidic nuclear phosphoprotein 32 (ANP32) [67-69], have been  
496 identified. Since the nuclear matrix and chromatin of infected cells were postulated to constitute  
497 a platform for viral transcription and replication [70-72], various potential host factors are  
498 associated with these sub-nuclear structures [73-76]. Linking the described regulators of IAV  
499 polymerase activity and the here presented data, it is quite possible that metabolic interference  
500 via 2-DG impairs the IAV replication-associated function or the expression of one or several of  
501 these viral or host factors. After all we know, however, it is also possible that there is no strong  
502 switching mechanism controlling viral transcription or replication. Potentially the abundance of

503 both processes is basically stochastic but can be modulated in favor of transcription or  
504 replication in a time-dependent manner. Combining the insights from previous publications  
505 with our data it is imaginable that the antiviral effect of 2-DG operates in several steps. One  
506 scenario could be that inhibition by 2-DG leads to a primary antiviral effect by interfering with  
507 the function of the initial transcription and replication complexes which could explain the  
508 generalized lower levels of mRNA and vRNA until 7 hpi (**Fig 4**). A secondary effect could be  
509 the seemingly selective impairment of the synthesis of some viral proteins. This includes at  
510 least PA of the polymerase or RNP complex (**Fig 2B**). Consequently, a lack of nascent  
511 polymerase complexes may have a stronger impact on replication than transcription since  
512 replication requires a second polymerase for the binding of nascent cRNA and vRNA strands.  
513 Alternatively or additionally, treatment with 2-DG might impair the synthesis of any of the  
514 afore-mentioned modulators of the viral polymerase which may contribute to the prolonged  
515 phase of transcription and the clear reduction of replication. Of course, the variety of potential  
516 2-DG-mediated influences on viral replication is huge and on top of that we cannot fully exclude  
517 an off-target interaction which may play a role here. However, the latter seems highly unlikely  
518 based on the data we generated through the supplementation of mannose and MLS in the  
519 presence of 2-DG (**Fig 7**). It will be interesting to examine if and how severely 2-DG influences  
520 the expression or interactions of the afore-mentioned viral and cellular factors with the complex  
521 replication machinery of IAV.

522 Furthermore, our data suggest that the predominant antiviral mode of action of 2-DG is the  
523 inhibition of glycolysis. Decades ago it has been postulated that the impairment of *N*-linked  
524 glycosylation is responsible for the antiviral effect of 2-DG [46]. The fact that inhibition of the  
525 enzyme MPI, which links glycolysis and glycosylation, abolished the restoration of viral titers  
526 and vRNA levels by mannose after treatment with 2-DG (**Fig 7B+C**) lets us oppose this view.  
527 Our data indicate that the positive effect of mannose on IAV replication mainly (but not  
528 necessarily exclusively) derives from fueling glycolysis via its conversion into F-6-P by MPI.  
529 The partial recovery of the ATP/AMP ratio back to the physiological level in the presence of  
530 2-DG and mannose (**Fig 6**) supports this theory. Moreover, the partial restoration of viral titers

531 by the supplementation of pyruvate after inhibiting glycolysis substantiates the assumption that  
532 glycolysis and its intermediates are crucial for virus reproduction. Probably the availability of  
533 glycolytic intermediates, which are needed to fuel other pathways and to synthesize  
534 macromolecules such as nucleotides and amino acids, is the most critical factor.  
535 Extrapolations predicted only a very minor extra demand for energy (~1% of the total energetic  
536 budget of a eukaryotic cell) to synthesize viral progeny during the characteristic time of an  
537 influenza infection [77]. Therefore, we assume that a potential role of ATP in viral replication  
538 may rather not be its availability for synthesis reactions.

539 As reviewed previously [78], 2-DG has various direct and indirect mechanism by which it can  
540 negatively affect normal cellular functions (e.g., inhibition of glycolysis and glycosylation or  
541 induction of AMPK and UPR). Therefore, a certain cytotoxicity – which heavily depends on the  
542 dose and type of administration as well as the type of cell, tissue, or organism – must be  
543 considered. However, we could demonstrate the tolerability and the quickness of effectivity of  
544 the antimetabolite in immortalized and primary cells (**Fig 1C-F, S1B, S2B+C**). Our *in vitro* data  
545 and previous reports [26, 27] support the performance of more *in vivo* studies and clinical trials  
546 to assess the safety of 2-DG and its efficiency to treat virus infections in model organisms or  
547 even humans. Several such studies have already reported the safety of 2-DG in animal models  
548 in the context of other virus infections [79] or different fields of research [80-82], especially  
549 when administered in continuous low doses. This could even be confirmed in clinical trials [83,  
550 84]. Very recent phase II and III clinical trials in India [85, 86] demonstrated the safety and  
551 effectiveness of 2-DG when applied in addition to the standard of care to treat severe  
552 COVID-19 patients. As studies in which a virus infection was more successfully treated in  
553 humans through metabolic interference, these clinical trials may become a milestone in the  
554 development of host-targeted metabolic drugs as antivirals. However, some studies [87, 88]  
555 and its poor pharmacokinetic properties, e.g., its short plasma half-life [89], suggest that 2-DG  
556 itself may never become a licensed drug. Nevertheless, it is a useful tool to examine the  
557 principles of glycolytic interference and novel 2-DG analogs or other glycolytic inhibitors  
558 possibly boast a better pharmacological suitability [90]. Since dependence on the host

559 metabolism is a universal feature of all viruses, differential and strictly determined metabolic  
560 treatments may be able to alleviate all types of virus infections in the future. However, before  
561 this may become reality, we need to gain a more comprehensive understanding of  
562 metabolism-related virus-host interactions, including virus-induced metabolic modifications,  
563 specific metabolic needs of different viruses and how exactly metabolic treatments affect the  
564 viral life cycle as well as the host. We are positive that this specific field of research deserves  
565 more attention to elaborate metabolic interference and make it become a realistic and sensible  
566 treatment option in the future.

567

## 568 **4. Experimental procedures**

### 569 **4.1 Cell lines and viruses**

570 Human adenocarcinomic alveolar basal epithelial cells (A549, American type culture collection  
571 (ATCC®), CCL-185™) and human embryonic kidney (HEK) 293t cells (ATCC®, CRL-3216™)  
572 were cultured in the high glucose variant of Dulbecco's modified Eagle's medium (DMEM,  
573 Sigma-Aldrich, D5796) supplemented with 10 % fetal bovine serum (FBS). Madin-Darby  
574 canine kidney (MDCK) II cells (Institute of Virology, WWU Muenster, Germany) were cultured  
575 in minimum essential medium (MEM, Sigma-Aldrich, M4655) supplemented with 10 % fetal  
576 bovine serum (FBS). The primary cells human bronchial epithelial cell (HBEpC, PromoCell,  
577 C-12640) were cultured in airway epithelial cell growth medium (AECGM, PromoCell,  
578 C-21060). Tumor-free human lung explants were obtained from various donors right after  
579 surgery at the University Hospital Muenster and were cultured in Roswell Park Memorial  
580 Institute-1640 medium (RPMI-1640, Sigma-Aldrich, R8758) supplemented with 100 U/mL  
581 penicillin and 0.1 mg/mL streptomycin. The donors gave written consent for the tissue to be  
582 used for scientific purposes. Ethical approval was given by the Deutsche Ärztekammer (AZ:  
583 2016-265-f-S). All cells were kept at 37 °C and 5 % CO<sub>2</sub>. Mouse-adapted  
584 A/Seal/Massachusetts/1/80 H7N7 (SC35M) and A/Panama/2007/1999 H3N2 (Pan/99) are  
585 recombinant influenza A virus (IAV) strains which were propagated in MDCK II cells.

### 586 **4.2 Infection and treatment**

587 Viruses were diluted to the desired multiplicity of infection (MOI) in phosphate-buffered saline  
588 (PBS) supplemented with 0.2 % bovine serum albumin (BSA), 1 mM MgCl<sub>2</sub>, 0.9 mM CaCl<sub>2</sub>,  
589 100 U/mL penicillin and 0.1 mg/mL streptomycin. Cells were washed once with PBS and  
590 incubated for 30 min at 37 °C and 5 % CO<sub>2</sub> with the respective amount of virus. Afterwards  
591 A549 and HEK293T cells were washed once more with PBS and then incubated for the  
592 depicted periods in DMEM (Thermo Fisher Scientific, A14430) containing 0.2 % bovine serum  
593 albumin (BSA), 100 U/mL penicillin and 0.1 mg/mL streptomycin, 25 mM D-glucose, 2 mM  
594 L-glutamine and the respective concentration of inhibitor/supplement. The medium did not  
595 contain sodium pyruvate, HEPES and phenol red. HBEpCs were washed once with PBS after  
596 an infection and incubated in AECGM, containing the respective amounts of  
597 inhibitor/supplement for the depicted periods of the experiments. Human lung explants  
598 (~100 mg) were infected with 2 x 10<sup>5</sup> infectious virus particles as described previously [91], but  
599 without any interferon or bafilomycin. After washing the tissue 1 hpi, it was incubated in fresh  
600 RPMI supplemented with 2 mM L-glutamine, 100 U/mL penicillin, 0.1 mg/mL streptomycin,  
601 0.1 % bovine serum albumin and the indicated concentrations of inhibitor. 2-deoxy-D-glucose  
602 (2-DG, Sigma-Aldrich, D8375), D-(+)-mannose (Sigma-Aldrich, M6020) and sodium pyruvate  
603 (Sigma-Aldrich, P5280) were dissolved in H<sub>2</sub>O to 1 M (2-DG and mannose) and 2 M (sodium  
604 pyruvate) stock solutions. MLS0315771 (MedChemExpress, HY-112945) was dissolved in  
605 dimethyl sulfoxide (DMSO) to a stock concentration of 10 mM. For the stimulation of immune  
606 responses via RNA transfection, RNA was isolated from mock-infected and SC35M-infected  
607 (MOI of 5) cells 8 hpi, as described in 4.7. 100 ng RNA per well was transfected using  
608 HiPerFect Transfection Reagent (QIAGEN) according to the manufacturer's protocol for 6 h in  
609 the presence of the depicted inhibitor concentrations.

### 610 **4.3 Plaque titration**

611 After the indicated periods of infection, the supernatants were collected and used to determine  
612 the number of infectious virus particles. Confluent MDCK II cells were infected with serial  
613 dilutions of the supernatants in PBS containing 0.2 % bovine serum albumin (BSA), 1 mM  
614 MgCl<sub>2</sub>, 0.9 mM CaCl<sub>2</sub>, 100 U/mL penicillin and 0.1 mg/mL streptomycin for 30 min at 37 °C

615 and 5 % CO<sub>2</sub>. Subsequently the supernatants were replaced with MEM/BA containing 0.21 %  
616 BSA, 0.21 % NaHCO<sub>3</sub>, 1 mM MgCl<sub>2</sub>, 0.01 % DEAE-dextran, 0.9 mM CaCl<sub>2</sub>,  
617 100 U/ml penicillin, 0.1 mg/ml streptomycin and 0.9 % purified agar. After an incubation for 2-3  
618 days at 37 °C and 5 % CO<sub>2</sub> the overlay was removed and cells were stained with a Coomassie  
619 staining solution (45 % ddH<sub>2</sub>O (v/v), 45 % methanol (v/v), 10 % acetic acid (v/v) and 0.25 %  
620 Coomassie Brilliant blue R-250 (w/v)). Cell free plaques in the monolayer were counted as  
621 plaque-forming units per milliliter (PFU/mL).

#### 622 **4.4 Cytotoxicity assays**

623 Potential cytotoxic effects of inhibitors were assessed by three different methods: lactate  
624 dehydrogenase (LDH) assay, trypan blue staining and flow cytometry. LDH assays were  
625 performed with the CytoSelect LDH cytotoxicity assay kit (Bio Cat, CBA-241-CB) according to  
626 the manufacturer's manual. Trypan blue exclusion was done by mixing a 0.4 % trypan blue  
627 dye (Invitrogen) 1:1 with a sample's cell suspension and having the automated cell counting  
628 machine Countess™ II (Invitrogen) determine the number of living cells. Determination of living  
629 cells via flow cytometry is described below in section **4.10**.

#### 630 **4.5 Glycolytic rate test**

631 The induced assay version of the glycolytic rate test (Agilent, Kit 103344-100) was performed  
632 with a Seahorse XFe96 Analyzer (Agilent) according to the manufacturer's instructions. The  
633 assay medium was supplemented with 25 mM D-glucose and 2 mM L-glutamine to match  
634 other experimental conditions. Concomitantly, the final injection of 2-DG was set to 125 mM.  
635 After three measured points to obtain the basal glycolytic level, the indicated concentrations of  
636 inhibitor were injected and the glycolytic rate was measured for 1 h before continuing with the  
637 standard procedure.

#### 638 **4.6 Lactate assay**

639 To determine the concentration of lactate in the supernatants of samples and thus have an  
640 indirect assay to assess glycolytic activity, the L-Lactate Assay Kit II (PK-CA577-K607) from  
641 PromoCell was used according to the manufacturer's instruction.

#### 642 **4.7 Reverse transcription and quantitative real-time PCR**



643 At the end of an infection and/or treatment period, total RNA was isolated using the RNeasy®  
644 Plus Mini Kit (Qiagen). The procedure was done according to the manufacturer's manual.  
645 Reverse transcription was performed with the RevertAid™ H Minus Reverse Transcriptase  
646 (Thermo Fisher Scientific) and oligo(dT) primers (Eurofins Genomics) for detection of mRNA  
647 or a fluA uni12 forward primer [92] (Sigma-Aldrich, 5'-AGCAAAGCAGG-3') to detect vRNA  
648 according to the manufacturer's protocol. The obtained cDNA was used for real-time qPCR  
649 with a LightCycler® 480 II (Roche) and Brilliant III SYBR® Green (Agilent) according to the  
650 manufacturer's instructions. The following primers were used during qPCR: influenza matrix  
651 protein M1 forward (5'-AGA TGA GTC TTC TAA CCG AGG TCG-3') and reverse (5'-TGC AAA  
652 AAC ATC TTC AAG TCT CTG-3'), IL-6 forward (5'-AGA GGC ACT GGC AGA AAA CAA C-3')  
653 and reverse (5'-AGG CAA GTC TCC TCA TTG AAT CC-3'), CXCL8 forward (5'-ACT GAG  
654 AGT GAT TGA GAG TGG AC-3') and reverse (5'-AAC CCT CTG CAC CCA GTT TTC-3'),  
655 DDX58 forward (5'-CCT ACC TAC ATC CTG AGC TAC AT-3') and reverse (5'-TCT AGG GCA  
656 TCC AAA AAG CCA-3'), MxA forward (5'-GTT TCC GAA GTG GAC ATC GCA-3') and reverse  
657 (5'-GAA GGG CAA CTC CTG ACA GT-3') and human glyceraldehyde 3-phosphate  
658 dehydrogenase (GAPDH) forward (5'-GCA AAT TCC ATG GCA CCG T-3') and reverse  
659 (5'-GCC CCA CTT GAT TTT GGA GG-3'). GAPDH, as a housekeeping gene, was used for  
660 the normalization of PCR results. The relative n-fold was calculated using the  $2^{-\Delta\Delta CT}$  method  
661 [93].

#### 662 **4.8 Strand-specific quantitative real-time RT-PCR**

663 Total RNA was isolate as described in 4.7. Reverse transcription was performed by using  
664 Maxima™ Reverse Transcriptase (Thermo Fisher Scientific) according to the manufacturer's  
665 instructions and specific primers (Eurofins Genomics) for the different types of RNA as  
666 reported previously [33]. The following primers were designed according to the SC35M  
667 sequences DQ266097, DQ226096 and DQ266095 (Influenza Research Database) and used  
668 for cDNA synthesis and qPCR of the SC35M segments 1, 5 and 6:

669 **Table 1: Primer for strand-specific real-time qPCR subdivided into their use in cDNA synthesis via reverse transcription**  
670 **and PCR.**

| target | purpose | primer name | sequence (5' - 3') | position (nt) |
|--------|---------|-------------|--------------------|---------------|
|--------|---------|-------------|--------------------|---------------|

|                    |      |     |                          |                                                |                             |           |
|--------------------|------|-----|--------------------------|------------------------------------------------|-----------------------------|-----------|
| segment 1<br>(PB2) | vRNA | RT  | vRNAtag_SC35M_seg1_1540F | GGCCGTCATGGTGCGAAT CGGGATCAACGAGGGAATGTACTAC   | 1540-1564                   |           |
|                    |      | PCR |                          | vRNAtag                                        | GGCCGTCATGGTGCGAAT          |           |
|                    |      |     |                          | SC35M_seg1_1704R                               | AGTTTCCCAGTTCCTGATGATCCA    | 1704-1681 |
|                    | mRNA | RT  | mRNAtag_SC35M_seg1_dTR   | CCAGATCGTTCGAGTCGT TTTTTTTTTTTTTTTAAACAATTCTGA | 2325-2310                   |           |
|                    |      | PCR |                          | mRNAtag                                        | CCAGATCGTTCGAGTCGT          |           |
|                    |      |     |                          | SC35M_seg1_2176F                               | GCGAAGGGAGAGAAGGCTAATGTGC   | 2176-2200 |
| segment 5<br>(NP)  | vRNA | RT  | vRNAtag_SC35M_seg5_675F  | GGCCGTCATGGTGCGAAT AAATGGGCGGAGAACAAGAATTGC    | 675-698                     |           |
|                    |      | PCR |                          | vRNAtag                                        | GGCCGTCATGGTGCGAAT          |           |
|                    |      |     |                          | SC35M_seg5_845R                                | CTCAGAATGAGAGCAGACCGTGCA    | 845-822   |
|                    | mRNA | RT  | mRNAtag_SC35M_seg5_dTR   | CCAGATCGTTCGAGTCGT TTTTTTTTTTTTTTTCTTAAATTGTT  | 1549-1534                   |           |
|                    |      | PCR |                          | mRNAtag                                        | CCAGATCGTTCGAGTCGT          |           |
|                    |      |     |                          | SC35M_seg5_1466F                               | CGATCGTGCTTCTTTGACATG       | 1466-1488 |
| segment 6<br>(NA)  | vRNA | RT  | vRNAtag_SC35M_seg6_734F  | GGCCGTCATGGTGCGAAT GTAGTGATGACCGATGGATCAGCA    | 734-757                     |           |
|                    |      | PCR |                          | vRNAtag                                        | GGCCGTCATGGTGCGAAT          |           |
|                    |      |     |                          | SC35M_seg6_885R                                | CAAGTTACTTTTGAATCGTGCCCATAG | 885-859   |
|                    | mRNA | RT  | mRNAtag_SC35M_seg6_dTR   | CCAGATCGTTCGAGTCGT TTTTTTTTTTTTTTTGCAATTTACGA  | 1445-1430                   |           |
|                    |      | PCR |                          | mRNAtag                                        | CCAGATCGTTCGAGTCGT          |           |
|                    |      |     |                          | SC35M_seg6_1338F                               | GGTGGACGAGCAACAGCTTAGTTGC   | 1338-1362 |

671

#### 672 4.9 Western blot

673 Samples were lysed at 4 °C with radioimmunoprecipitation assay (RIPA) buffer (25 mM  
674 Tris-HCl pH 8, 137 mM NaCl, 10 % glycerol, 0.1 % SDS, 0.5 % NaDOC, 1 % NP-40, 2 mM  
675 EDTA pH 8, 200 µM Pefabloc®, 5 µg/mL aprotinin, 5 µg/mL leupeptin, 1 mM sodium  
676 orthovanadate and 5 mM benzamidine). Cell debris was removed via centrifugation and  
677 protein concentrations were determined by Bradford assay. Samples were adjusted to the  
678 same protein concentration, mixed with the appropriate amount of Laemmli sample buffer and  
679 then proteins were separated and visualized by sodium dodecyl sulfate polyacrylamide gel  
680 electrophoresis (SDS-PAGE) and western blot analysis. The following primary antibodies were  
681 used to detect their respective proteins: ERK2 (rabbit, polyclonal, Santa Cruz, sc-154), M1  
682 (mouse, monoclonal, Biorad, MCA401), NP (rabbit, polyclonal, GeneTex, GTX125989), NS1  
683 (rabbit, polyclonal, GeneTex, GTX125990), and PA (rabbit, polyclonal, GeneTex,  
684 GTX125932). ERK2 served as the loading control for whole cell lysates. Fluorescence signals  
685 were visualized by using fluorophore-labelled secondary antibodies: IRDye® 680RD Donkey  
686 anti-Mouse (LI-COR, 926-68072), IRDye® 680RD Donkey anti-Rabbit (LI-COR, 926-68073),  
687 IRDye® 800CW Donkey anti-Mouse (LI-COR, 926-32212), and IRDye® 800CW Donkey

688 anti-Rabbit (LI-COR, 926-32213). Images were taken with the ODYSSEY® F<sub>C</sub> Imaging System  
689 (LI-COR).

#### 690 **4.10 Flow Cytometry**

691 At the end of an infection with or without treatment, cells were trypsinized and subsequently  
692 stained for analysis via flow cytometry with the FACSCalibur (Becton Dickinson) flow  
693 cytometer. At first, cells were stained with eBioscience™ Fixable Viability Dye eFluor™ 660  
694 (Invitrogen, 65-0866-14) for 30 min at 4 °C in the dark. Afterwards the samples were fixated  
695 and permeabilized for 20 min and 60 min at 4 °C in the dark using BD Cytotfix/Cytoperm™  
696 solution and BD Perm/Wash™ solution (BD Biosciences), respectively. Intracellular staining of  
697 influenza A nucleoprotein was done by applying the anti influenza A (nucleoprotein) – FITC  
698 antibody (OriGene, AM00924FC-N) for 60 min at 4 °C in the dark. FlowJo software v10 (Becton  
699 Dickinson) was used to analyze the data obtained by flow cytometry. 10<sup>5</sup> cells of each sample  
700 were analyzed. The gating strategy is displayed in **Fig S6**.

#### 701 **4.11 Minigenome assay**

702 Using Lipofectamine™ 2000 (Invitrogen), HEK293T cells were transfected with polymerase  
703 II-driven plasmids coding for PA, PB1, PB2, NP of SC35M as well as the transfection control  
704 *Renilla* luciferase. A sixth plasmid was one of two polymerase I-driven plasmids encoding  
705 either a vRNA-like or cRNA-like firefly luciferase template. 4 h post transfection the medium  
706 was replaced with DMEM (Thermo Fisher Scientific, A14430) containing 0.2 % BSA, 100 U/mL  
707 penicillin and 0.1 mg/mL streptomycin, 25 mM D-glucose, 2 mM L-glutamine and the  
708 respective concentration of 2-DG. 24 h post transfection the Dual-Luciferase® Reporter Assay  
709 System (Promega) was used according to the manufacturer's manual. For measurements of  
710 relative light units (RLU) the luminometer MicroLumat<sup>Plus</sup> LB 96V (Berthold Technologies)  
711 and the software WinGlow (Berthold Technologies) were used.

#### 712 **4.12 RNP durability assay**

713 HEK293T cells were transfected with plasmids coding for PA, PB1, PB2 and NP of SC35M  
714 using Lipofectamine™ 2000 (Invitrogen). 24 h post transfection cells were infected with SC35M  
715 at an MOI of 5 (see **4.2**) and incubated with or without cycloheximide (100 µg/mL) and various

716 concentrations of 2-DG. 6 hpi cell lysates were taken and subjected to strand-specific  
717 quantitative real-time RT-PCR (see **4.8**).

#### 718 **4.13 Metabolic profiling by HILIC-MS/MS**

719 24 h after seeding  $1.5 \times 10^6$  A549 cells in 6 cm dishes, they were mock-infected or infected  
720 with SC35M at an MOI of 0.001. 24 hpi cells were washed twice with PBS and 400  $\mu$ L  
721 pre-cooled (4-8 °C) acetonitrile (ACN)/water (4+1, v/v) including 50  $\mu$ M D-phenylglycine as  
722 internal standard was added for metabolic quenching. Until further preparation the samples  
723 were kept at 4-8 °C. Cells were then detached using a sterile cell scraper. The dish was  
724 washed with additional 800  $\mu$ L ACN/water (4+1, v/v) and pooled with the respective cell  
725 sample. Further preparation of samples as well as chromatographic and mass spectrometric  
726 analysis were performed as described previously [36].

727

#### 728 **5. Acknowledgement**

729 J.K is a member of CiM-IMPRS, the joint graduate school of the Cells in Motion Interfaculty  
730 Centre, University of Muenster, Germany and the International Max Planck Research  
731 School-Molecular Biomedicine, Muenster, Germany. Besides, we acknowledge technical  
732 support from L. Schürmann.

## 733 References

- 734 1. Girard MP, Cherian T, Pervikov Y, Kieny MP. A review of vaccine research and  
735 development: human acute respiratory infections. *Vaccine*. 2005;23(50):5708-24.
- 736 2. Sanchez EL, Lagunoff M. Viral activation of cellular metabolism. *Virology*. 2015;479-  
737 480:609-18.
- 738 3. Thaker SK, Ch'ng J, Christofk HR. Viral hijacking of cellular metabolism. *BMC Biol*.  
739 2019;17(1):59.
- 740 4. Mayer KA, Stockl J, Zlabinger GJ, Gualdoni GA. Hijacking the Supplies: Metabolism as a  
741 Novel Facet of Virus-Host Interaction. *Front Immunol*. 2019;10:1533.
- 742 5. Moreno-Altamirano MMB, Kolstoe SE, Sanchez-Garcia FJ. Virus Control of Cell  
743 Metabolism for Replication and Evasion of Host Immune Responses. *Front Cell Infect*  
744 *Microbiol*. 2019;9:95.
- 745 6. Kleinehr J, Wilden JJ, Boergeling Y, Ludwig S, Hrincius ER. Metabolic Modifications by  
746 Common Respiratory Viruses and Their Potential as New Antiviral Targets. *Viruses*.  
747 2021;13(10).
- 748 7. Smallwood HS, Duan S, Morfouace M, Rezinciuc S, Shulkin BL, Shelat A, et al. Targeting  
749 Metabolic Reprogramming by Influenza Infection for Therapeutic Intervention. *Cell Rep*.  
750 2017;19(8):1640-53.
- 751 8. Ritter JB, Wahl AS, Freund S, Genzel Y, Reichl U. Metabolic effects of influenza virus  
752 infection in cultured animal cells: Intra- and extracellular metabolite profiling. *BMC Syst Biol*.  
753 2010;4:61.
- 754 9. Tian X, Zhang K, Min J, Chen C, Cao Y, Ding C, et al. Metabolomic Analysis of Influenza  
755 A Virus A/WSN/1933 (H1N1) Infected A549 Cells during First Cycle of Viral Replication. *Viruses*.  
756 2019;11(11).
- 757 10. Klemperer H. Glucose breakdown in chick embryo cells infected with influenza virus.  
758 *Virology*. 1961;13:68-77.
- 759 11. Kilbourne ED. Inhibition of influenza virus multiplication with a glucose antimetabolite  
760 (2-deoxy-D-glucose). *Nature*. 1959;183(4656):271-2.
- 761 12. Kohio HP, Adamson AL. Glycolytic control of vacuolar-type ATPase activity: a  
762 mechanism to regulate influenza viral infection. *Virology*. 2013;444(1-2):301-9.
- 763 13. Warburg O, Wind F, Negelein E. The Metabolism of Tumors in the Body. *J Gen Physiol*.  
764 1927;8(6):519-30.
- 765 14. Warburg O. On the origin of cancer cells. *Science*. 1956;123(3191):309-14.
- 766 15. Thyrssted J, Storgaard J, Blay-Cadanet J, Heinz A, Thielke AL, Crotta S, et al. Influenza A  
767 induces lactate formation to inhibit type I IFN in primary human airway epithelium. *iScience*.  
768 2021;24(11):103300.
- 769 16. Datema R, Schwarz RT. Interference with glycosylation of glycoproteins. Inhibition of  
770 formation of lipid-linked oligosaccharides in vivo. *Biochem J*. 1979;184(1):113-23.
- 771 17. Nakamura K, Compans RW. Effects of glucosamine, 2-deoxyglucose, and tunicamycin  
772 on glycosylation, sulfation, and assembly of influenza viral proteins. *Virology*. 1978;84(2):303-  
773 19.
- 774 18. Wick AN, Drury DR, Nakada HI, Wolfe JB. Localization of the primary metabolic block  
775 produced by 2-deoxyglucose. *J Biol Chem*. 1957;224(2):963-9.
- 776 19. Urakami K, Zangiacomì V, Yamaguchi K, Kusuhara M. Impact of 2-deoxy-D-glucose on  
777 the target metabolome profile of a human endometrial cancer cell line. *Biomed Res*.  
778 2013;34(5):221-9.
- 779 20. Zhang D, Li J, Wang F, Hu J, Wang S, Sun Y. 2-Deoxy-D-glucose targeting of glucose  
780 metabolism in cancer cells as a potential therapy. *Cancer Lett*. 2014;355(2):176-83.

- 781 21. Pelicano H, Martin DS, Xu RH, Huang P. Glycolysis inhibition for anticancer treatment.  
782 *Oncogene*. 2006;25(34):4633-46.
- 783 22. Pajak B, Siwiak E, Soltyka M, Priebe A, Zielinski R, Fokt I, et al. 2-Deoxy-d-Glucose and  
784 Its Analogs: From Diagnostic to Therapeutic Agents. *Int J Mol Sci*. 2019;21(1).
- 785 23. Mesri EA, Lampidis TJ. 2-Deoxy-d-glucose exploits increased glucose metabolism in  
786 cancer and viral-infected cells: Relevance to its use in India against SARS-CoV-2. *IUBMB Life*.  
787 2021;73(10):1198-204.
- 788 24. Schwarz RT, Schmidt MF, Anwer U, Klenk HD. Carbohydrates of influenza virus. I.  
789 Glycopeptides derived from viral glycoproteins after labeling with radioactive sugars. *J Virol*.  
790 1977;23(2):217-26.
- 791 25. Schwarz RT, Schmidt MF, Datema R. Inhibition of glycosylation of viral glycoproteins.  
792 *Biochem Soc Trans*. 1979;7(2):322-6.
- 793 26. Puschel F, Favaro F, Redondo-Pedraza J, Lucendo E, Iurlaro R, Marchetti S, et al.  
794 Starvation and antimetabolic therapy promote cytokine release and recruitment of immune  
795 cells. *Proc Natl Acad Sci U S A*. 2020;117(18):9932-41.
- 796 27. Bhatt AN, Kumar A, Rai Y, Kumari N, Vedagiri D, Harshan KH, et al. Glycolytic inhibitor  
797 2-deoxy-d-glucose attenuates SARS-CoV-2 multiplication in host cells and weakens the  
798 infective potential of progeny virions. *Life Sci*. 2022;295:120411.
- 799 28. Zhang XD, Deslandes E, Villedieu M, Poulain L, Duval M, Gauduchon P, et al. Effect of  
800 2-deoxy-D-glucose on various malignant cell lines in vitro. *Anticancer Res*. 2006;26(5A):3561-  
801 6.
- 802 29. Nef HM, Mollmann H, Joseph A, Troidl C, Voss S, Vogt A, et al. Effects of 2-deoxy-D-  
803 glucose on proliferation of vascular smooth muscle cells and endothelial cells. *J Int Med Res*.  
804 2008;36(5):986-91.
- 805 30. Smith JA. Regulation of Cytokine Production by the Unfolded Protein Response;  
806 Implications for Infection and Autoimmunity. *Front Immunol*. 2018;9:422.
- 807 31. Te Velthuis AJ, Fodor E. Influenza virus RNA polymerase: insights into the mechanisms  
808 of viral RNA synthesis. *Nat Rev Microbiol*. 2016;14(8):479-93.
- 809 32. Dou D, Revol R, Ostbye H, Wang H, Daniels R. Influenza A Virus Cell Entry, Replication,  
810 Virion Assembly and Movement. *Front Immunol*. 2018;9:1581.
- 811 33. Kawakami E, Watanabe T, Fujii K, Goto H, Watanabe S, Noda T, et al. Strand-specific  
812 real-time RT-PCR for distinguishing influenza vRNA, cRNA, and mRNA. *J Virol Methods*.  
813 2011;173(1):1-6.
- 814 34. Te Velthuis AJW, Long JS, Barclay WS. Assays to Measure the Activity of Influenza Virus  
815 Polymerase. *Methods Mol Biol*. 2018;1836:343-74.
- 816 35. Vreede FT, Jung TE, Brownlee GG. Model suggesting that replication of influenza virus  
817 is regulated by stabilization of replicative intermediates. *J Virol*. 2004;78(17):9568-72.
- 818 36. Gerdemann A, Behrens M, Esselen M, Humpf HU. Metabolic profiling as a powerful  
819 tool for the analysis of cellular alterations caused by 20 mycotoxins in HepG2 cells. *Arch*  
820 *Toxicol*. 2022;96(11):2983-98.
- 821 37. Angel JF. Gluconeogenesis in meal-fed, vitamin B-6-deficient rats. *J Nutr*.  
822 1980;110(2):262-9.
- 823 38. Nanbara S, Tanaka K, Koide H, Tanaka T, Hayashi T. Changes on levels of B6 vitamin  
824 and aminotransferase in the liver of diabetic animals. *Diabetes Res Clin Pract*. 1990;9(2):109-  
825 14.
- 826 39. Chen KK, Minakuchi M, Wuputra K, Ku CC, Pan JB, Kuo KK, et al. Redox control in the  
827 pathophysiology of influenza virus infection. *BMC Microbiol*. 2020;20(1):214.

- 828 40. Lin X, Wang R, Zou W, Sun X, Liu X, Zhao L, et al. The Influenza Virus H5N1 Infection  
829 Can Induce ROS Production for Viral Replication and Host Cell Death in A549 Cells Modulated  
830 by Human Cu/Zn Superoxide Dismutase (SOD1) Overexpression. *Viruses*. 2016;8(1).
- 831 41. Suliman HB, Ryan LK, Bishop L, Folz RJ. Prevention of influenza-induced lung injury in  
832 mice overexpressing extracellular superoxide dismutase. *Am J Physiol Lung Cell Mol Physiol*.  
833 2001;280(1):L69-78.
- 834 42. Keshavarz M, Solaymani-Mohammadi F, Namdari H, Arjeini Y, Mousavi MJ, Rezaei F.  
835 Metabolic host response and therapeutic approaches to influenza infection. *Cell Mol Biol Lett*.  
836 2020;25:15.
- 837 43. Akaike T, Ando M, Oda T, Doi T, Ijiri S, Araki S, et al. Dependence on O<sub>2</sub>- generation by  
838 xanthine oxidase of pathogenesis of influenza virus infection in mice. *J Clin Invest*.  
839 1990;85(3):739-45.
- 840 44. Trauner DA, Horvath E, Davis LE. Inhibition of fatty acid beta oxidation by influenza B  
841 virus and salicylic acid in mice: implications for Reye's syndrome. *Neurology*. 1988;38(2):239-  
842 41.
- 843 45. Sharma V, Ichikawa M, Freeze HH. Mannose metabolism: more than meets the eye.  
844 *Biochem Biophys Res Commun*. 2014;453(2):220-8.
- 845 46. Schwarz RT, Klenk HD. Inhibition of glycosylation of the influenza virus hemagglutinin.  
846 *J Virol*. 1974;14(5):1023-34.
- 847 47. Klenk HD, Scholtissek C, Rott R. Inhibition of glycoprotein biosynthesis of influenza  
848 virus by D-glucosamine and 2-deoxy-D-glucose. *Virology*. 1972;49(3):723-34.
- 849 48. Kurtoglu M, Gao N, Shang J, Maher JC, Lehrman MA, Wangpaichitr M, et al. Under  
850 normoxia, 2-deoxy-D-glucose elicits cell death in select tumor types not by inhibition of  
851 glycolysis but by interfering with N-linked glycosylation. *Mol Cancer Ther*. 2007;6(11):3049-  
852 58.
- 853 49. Sharma V, Ichikawa M, He P, Scott DA, Bravo Y, Dahl R, et al. Phosphomannose  
854 isomerase inhibitors improve N-glycosylation in selected phosphomannomutase-deficient  
855 fibroblasts. *J Biol Chem*. 2011;286(45):39431-8.
- 856 50. Hamza H, Shehata MM, Mostafa A, Pleschka S, Planz O. Improved in vitro Efficacy of  
857 Baloxavir Marboxil Against Influenza A Virus Infection by Combination Treatment With the  
858 MEK Inhibitor ATR-002. *Front Microbiol*. 2021;12:611958.
- 859 51. Takahashi K, Furuta Y, Fukuda Y, Kuno M, Kamiyama T, Kozaki K, et al. In vitro and in  
860 vivo activities of T-705 and oseltamivir against influenza virus. *Antivir Chem Chemother*.  
861 2003;14(5):235-41.
- 862 52. Beaton AR, Krug RM. Transcription antitermination during influenza viral template RNA  
863 synthesis requires the nucleocapsid protein and the absence of a 5' capped end. *Proc Natl*  
864 *Acad Sci U S A*. 1986;83(17):6282-6.
- 865 53. Shapiro GI, Krug RM. Influenza virus RNA replication in vitro: synthesis of viral template  
866 RNAs and virion RNAs in the absence of an added primer. *J Virol*. 1988;62(7):2285-90.
- 867 54. Newcomb LL, Kuo RL, Ye Q, Jiang Y, Tao YJ, Krug RM. Interaction of the influenza a virus  
868 nucleocapsid protein with the viral RNA polymerase potentiates unprimed viral RNA  
869 replication. *J Virol*. 2009;83(1):29-36.
- 870 55. Kawaguchi A, Momose F, Nagata K. Replication-coupled and host factor-mediated  
871 encapsidation of the influenza virus genome by viral nucleoprotein. *J Virol*. 2011;85(13):6197-  
872 204.
- 873 56. Marion RM, Zurcher T, de la Luna S, Ortin J. Influenza virus NS1 protein interacts with  
874 viral transcription-replication complexes in vivo. *J Gen Virol*. 1997;78 ( Pt 10):2447-51.

- 875 57. Min JY, Li S, Sen GC, Krug RM. A site on the influenza A virus NS1 protein mediates both  
876 inhibition of PKR activation and temporal regulation of viral RNA synthesis. *Virology*.  
877 2007;363(1):236-43.
- 878 58. Robb NC, Smith M, Vreede FT, Fodor E. NS2/NEP protein regulates transcription and  
879 replication of the influenza virus RNA genome. *J Gen Virol*. 2009;90(Pt 6):1398-407.
- 880 59. Perez JT, Varble A, Sachidanandam R, Zlatev I, Manoharan M, Garcia-Sastre A, et al.  
881 Influenza A virus-generated small RNAs regulate the switch from transcription to replication.  
882 *Proc Natl Acad Sci U S A*. 2010;107(25):11525-30.
- 883 60. Umbach JL, Yen HL, Poon LL, Cullen BR. Influenza A virus expresses high levels of an  
884 unusual class of small viral leader RNAs in infected cells. *mBio*. 2010;1(4).
- 885 61. Perez JT, Zlatev I, Aggarwal S, Subramanian S, Sachidanandam R, Kim B, et al. A small-  
886 RNA enhancer of viral polymerase activity. *J Virol*. 2012;86(24):13475-85.
- 887 62. Olson AC, Rosenblum E, Kuchta RD. Regulation of influenza RNA polymerase activity  
888 and the switch between replication and transcription by the concentrations of the vRNA 5'  
889 end, the cap source, and the polymerase. *Biochemistry*. 2010;49(47):10208-15.
- 890 63. Jorba N, Juarez S, Torreira E, Gastaminza P, Zamarreno N, Albar JP, et al. Analysis of the  
891 interaction of influenza virus polymerase complex with human cell factors. *Proteomics*.  
892 2008;8(10):2077-88.
- 893 64. Mayer D, Molawi K, Martinez-Sobrido L, Ghanem A, Thomas S, Baginsky S, et al.  
894 Identification of cellular interaction partners of the influenza virus ribonucleoprotein complex  
895 and polymerase complex using proteomic-based approaches. *J Proteome Res*. 2007;6(2):672-  
896 82.
- 897 65. Watanabe T, Kawakami E, Shoemaker JE, Lopes TJ, Matsuoka Y, Tomita Y, et al.  
898 Influenza virus-host interactome screen as a platform for antiviral drug development. *Cell Host*  
899 *Microbe*. 2014;16(6):795-805.
- 900 66. Sugiyama K, Kawaguchi A, Okuwaki M, Nagata K. pp32 and APRIL are host cell-derived  
901 regulators of influenza virus RNA synthesis from cRNA. *Elife*. 2015;4.
- 902 67. Carrique L, Fan H, Walker AP, Keown JR, Sharps J, Staller E, et al. Host ANP32A mediates  
903 the assembly of the influenza virus replicase. *Nature*. 2020;587(7835):638-43.
- 904 68. Staller E, Sheppard CM, Neasham PJ, Mistry B, Peacock TP, Goldhill DH, et al. ANP32  
905 Proteins Are Essential for Influenza Virus Replication in Human Cells. *J Virol*. 2019;93(17).
- 906 69. Zhang H, Zhang Z, Wang Y, Wang M, Wang X, Zhang X, et al. Fundamental Contribution  
907 and Host Range Determination of ANP32A and ANP32B in Influenza A Virus Polymerase  
908 Activity. *J Virol*. 2019;93(13).
- 909 70. Jackson DA, Caton AJ, McCready SJ, Cook PR. Influenza virus RNA is synthesized at fixed  
910 sites in the nucleus. *Nature*. 1982;296(5855):366-8.
- 911 71. Takizawa N, Watanabe K, Nouno K, Kobayashi N, Nagata K. Association of functional  
912 influenza viral proteins and RNAs with nuclear chromatin and sub-chromatin structure.  
913 *Microbes Infect*. 2006;8(3):823-33.
- 914 72. Chase GP, Rameix-Welti MA, Zvirbliene A, Zvirblis G, Gotz V, Wolff T, et al. Influenza  
915 virus ribonucleoprotein complexes gain preferential access to cellular export machinery  
916 through chromatin targeting. *PLoS Pathog*. 2011;7(9):e1002187.
- 917 73. Ver LS, Marcos-Villar L, Landeras-Bueno S, Nieto A, Ortin J. The Cellular Factor  
918 NXP2/MORC3 Is a Positive Regulator of Influenza Virus Multiplication. *J Virol*.  
919 2015;89(19):10023-30.
- 920 74. Alfonso R, Lutz T, Rodriguez A, Chavez JP, Rodriguez P, Gutierrez S, et al. CHD6  
921 chromatin remodeler is a negative modulator of influenza virus replication that relocates to  
922 inactive chromatin upon infection. *Cell Microbiol*. 2011;13(12):1894-906.



- 923 75. Marcos-Villar L, Pazo A, Nieto A. Influenza Virus and Chromatin: Role of the CHD1  
924 Chromatin Remodeler in the Virus Life Cycle. *J Virol*. 2016;90(7):3694-707.
- 925 76. Rodriguez A, Perez-Gonzalez A, Nieto A. Cellular human CLE/C14orf166 protein  
926 interacts with influenza virus polymerase and is required for viral replication. *J Virol*.  
927 2011;85(22):12062-6.
- 928 77. Mahmoudabadi G, Milo R, Phillips R. Energetic cost of building a virus. *Proc Natl Acad*  
929 *Sci U S A*. 2017;114(22):E4324-E33.
- 930 78. Laussel C, Leon S. Cellular toxicity of the metabolic inhibitor 2-deoxyglucose and  
931 associated resistance mechanisms. *Biochem Pharmacol*. 2020;182:114213.
- 932 79. Gualdoni GA, Mayer KA, Kapsch AM, Kreuzberg K, Puck A, Kienzl P, et al. Rhinovirus  
933 induces an anabolic reprogramming in host cell metabolism essential for viral replication. *Proc*  
934 *Natl Acad Sci U S A*. 2018;115(30):E7158-E65.
- 935 80. Vijayaraghavan R, Kumar D, Dube SN, Singh R, Pandey KS, Bag BC, et al. Acute toxicity  
936 and cardio-respiratory effects of 2-deoxy-D-glucose: a promising radio sensitiser. *Biomed*  
937 *Environ Sci*. 2006;19(2):96-103.
- 938 81. Chiaravalli M, Rowe I, Mannella V, Quilici G, Canu T, Bianchi V, et al. 2-Deoxy-d-Glucose  
939 Ameliorates PKD Progression. *J Am Soc Nephrol*. 2016;27(7):1958-69.
- 940 82. Kovarik JJ, Kernbauer E, Holzl MA, Hofer J, Gualdoni GA, Schmetterer KG, et al. Fasting  
941 metabolism modulates the interleukin-12/interleukin-10 cytokine axis. *PLoS One*.  
942 2017;12(7):e0180900.
- 943 83. Stein M, Lin H, Jeyamohan C, Dvorzhinski D, Gounder M, Bray K, et al. Targeting tumor  
944 metabolism with 2-deoxyglucose in patients with castrate-resistant prostate cancer and  
945 advanced malignancies. *Prostate*. 2010;70(13):1388-94.
- 946 84. Raez LE, Papadopoulos K, Ricart AD, Chiorean EG, Dipaola RS, Stein MN, et al. A phase  
947 I dose-escalation trial of 2-deoxy-D-glucose alone or combined with docetaxel in patients with  
948 advanced solid tumors. *Cancer Chemother Pharmacol*. 2013;71(2):523-30.
- 949 85. Sahu KK, Kumar R. Role of 2-Deoxy-D-Glucose (2-DG) in COVID-19 disease: A potential  
950 game-changer. *J Family Med Prim Care*. 2021;10(10):3548-52.
- 951 86. Bhatt AN, Shenoy S, Munjal S, Chinnadurai V, Agarwal A, Vinoth Kumar A, et al. 2-  
952 deoxy-D-glucose as an adjunct to standard of care in the medical management of COVID-19:  
953 a proof-of-concept and dose-ranging randomised phase II clinical trial. *BMC Infect Dis*.  
954 2022;22(1):669.
- 955 87. Wang A, Huen SC, Luan HH, Yu S, Zhang C, Gallezot JD, et al. Opposing Effects of Fasting  
956 Metabolism on Tissue Tolerance in Bacterial and Viral Inflammation. *Cell*. 2016;166(6):1512-  
957 25 e12.
- 958 88. Chou SH, Kojic LD, Messingham KN, Cunnick JE. Characterization of the effect of 2-  
959 deoxy-D-glucose(2-DG) on the immune system. *Brain Behav Immun*. 1996;10(4):399-416.
- 960 89. Hansen IL, Levy MM, Kerr DS. The 2-deoxyglucose test as a supplement to fasting for  
961 detection of childhood hypoglycemia. *Pediatr Res*. 1984;18(4):359-64.
- 962 90. Pajak B, Zielinski R, Manning JT, Matejin S, Paessler S, Fokt I, et al. The Antiviral Effects  
963 of 2-Deoxy-D-glucose (2-DG), a Dual D-Glucose and D-Mannose Mimetic, against SARS-CoV-2  
964 and Other Highly Pathogenic Viruses. *Molecules*. 2022;27(18).
- 965 91. Matos ADR, Wunderlich K, Schloer S, Schughart K, Geffers R, Seders M, et al. Antiviral  
966 potential of human IFN-alpha subtypes against influenza A H3N2 infection in human lung  
967 explants reveals subtype-specific activities. *Emerg Microbes Infect*. 2019;8(1):1763-76.
- 968 92. Hoffmann E, Stech J, Guan Y, Webster RG, Perez DR. Universal primer set for the full-  
969 length amplification of all influenza A viruses. *Arch Virol*. 2001;146(12):2275-89.

970 93. Livak KJ, Schmittgen TD. Analysis of relative gene expression data using real-time  
971 quantitative PCR and the 2(-Delta Delta C(T)) Method. *Methods*. 2001;25(4):402-8.  
972  
973

974 **Fig 1: 2-DG impairs IAV propagation and is well tolerated by A549 cells. (A+B)** 24 h after seeding, A549 cells were infected  
975 with SC35M at an MOI of 0.001 for 30 min and incubated in the presence of 25 mM glucose and the indicated concentrations of  
976 2-DG or its solvent water for **(A)** 24 h or **(B)** 24 and 48 h. Subsequently, supernatants were collected to determine viral titers via  
977 plaque assay. **(C)** Uninfected cells were treated with the indicated inhibitor concentrations for 24 h and were then subjected to  
978 LDH assay for assessment of the relative cytotoxicity of the treatment. **(D-F)** The glycolytic proton efflux rate (glycoPER),  
979 extracellular acidification rate (ECAR) and oxygen consumption rate (OCR) were measured in real-time via glycolytic rate assay  
980 and a Seahorse XFe96 Analyzer. The kinetics show the influence of different concentrations of 2-DG on the three measured  
981 parameters. Depicted are the means  $\pm$  SD of **(A-C)** three or **(D-F)** five independent experiments with **(A-C)** three or **(D-F)** four  
982 biological replicates per condition and experiment. Statistical significances were determined via **(A)** unpaired one-way ANOVA  
983 and Dunnett's correction, comparing all treated samples to the water control and **(B-F)** ordinary two-way ANOVA with **(B)** Tukey's,  
984 **(C)** Sidak's and **(D-F)** Dunnett's correction for multiple comparison, comparing **(B)** all samples with one another, **(C)** all treated  
985 samples of one group to the respective water control or **(D-F)** the time points of differentially treated cells with their respective  
986 start value. p-values are indicated as follows:  $< 0.05 = *$ ,  $< 0.01 = **$ ,  $< 0.001 = ***$ ,  $< 0.0001 = ****$ .

987 **Fig 2: 2-DG mildly reduces the expression of viral proteins. (A+B)** 24 h after seeding, A549 cells were infected with SC35M  
988 at the depicted MOIs for 30 min and were incubated with 25 mM glucose and the indicated concentrations of 2-DG for a total of  
989 **(A)** 24 h or **(B)** 8 h. Lysates of triplicates were unified to yield sufficient protein amounts. Proteins were separated via SDS-PAGE.  
990 Visualization was done using primary antibodies against PA (rabbit), M1 (mouse), NP (rabbit), NS1 (rabbit) and ERK2 (rabbit) and  
991 fluorescence-labelled anti-mouse (donkey) and anti-rabbit (donkey) secondary antibodies. Depicted are representative protein  
992 bands from three independent experiments. **(C)** HEK293T cells were, 24 h after seeding, transfected with an empty vector or a  
993 plasmid containing the *Renilla* luciferase gene which is under the control of a constitutive herpes simplex virus thymidine kinase  
994 promoter. Subsequently, the cells were incubated with the shown 2-DG concentrations. After 24 h, cells were lysed and the n-fold  
995 of relative light units (RLU) in comparison to the water control was measured via luciferase assay. Depicted are the means  $\pm$  SD  
996 of three independent experiments with three biological replicates per condition and experiment. Statistical significances were  
997 determined via unpaired one-way ANOVA and Dunnett's correction, comparing all treated samples to the water control. p-values  
998 are indicated as follows:  $< 0.05 = *$ ,  $< 0.01 = **$ ,  $< 0.001 = ***$ ,  $< 0.0001 = ****$ .

999 **Fig 3: 2-DG conversely affects IAV mRNA and vRNA accumulation.** 24 h after seeding, A549 cells were infected with SC35M  
1000 at the depicted MOIs for 30 min and were incubated with 25 mM glucose and the indicated concentrations of 2-DG for a total of  
1001 **(A+B)** 24 h or **(C+D)** 8 h. Subsequently, cells were lysed, their RNA isolated and cDNA synthesized using either **(A+C)** oligo(dT)  
1002 primers to transcribe mRNA or **(B+D)** fluA uni12 primers to transcribe vRNA. Real-time qPCR was performed with two technical  
1003 replicates per sample and values of treated samples were normalized to the water control. In case of mRNA detection, all results  
1004 were additionally normalized to a GAPDH control. Depicted are the means  $\pm$  SD of three independent experiments with three  
1005 biological replicates per condition and experiment. Statistical significances were determined via unpaired one-way ANOVA and  
1006 Dunnett's correction, comparing all treated samples to the water control. p-values are indicated as follows:  $< 0.05 = *$ ,  $< 0.01 = **$ ,  
1007  $< 0.001 = ***$ ,  $< 0.0001 = ****$ .

1008 **Fig 4: Prolongation of IAV transcription and reduction of replication by 2-DG.** 24 h after seeding, A549 cells were infected  
1009 with SC35M at an MOI of 5 for 30 min and were incubated without or with 10 mM 2-DG in the presence of 25 mM glucose for a  
1010 total of 8 h. **(A+B)** Each hour or **(C-H)** 8 hpi cells were lysed, their RNA isolated and cDNA synthesized using **(A)** oligo(dT) primers,  
1011 **(B)** fluA uni12 primers or **(C-H)** specific primers to transcribe mRNA and vRNA of the SC35M gene segments 1 (PB2), 5 (NP) and  
1012 6 (NA). Real-time qPCR was performed with two technical replicates per sample. **(A+B)** All values were normalized to the water  
1013 control 1 hpi or **(C-H)** values of treated samples were normalized to the water control. Depicted are the means  $\pm$  SD of three  
1014 independent experiments with three biological replicates per condition and experiment. Statistical significances were determined  
1015 **(A+B)** via ordinary two-way ANOVA and Sidak's correction, comparing the treated sample of each time point to its respective  
1016 water control or **(C-H)** via unpaired t-test. p-values are indicated as follows:  $< 0.05 = *$ ,  $< 0.01 = **$ ,  $< 0.001 = ***$ ,  $< 0.0001 = ****$ .

1017 **Fig 5: 2-DG shows no effect on the replicative capacity of the IAV polymerase.** 24 h after seeding, HEK293T cells were  
1018 transfected with plasmids encoding PA, PB1, PB2 and NP of SC35M, the transfection control *Renilla* luciferase and either a **(A)**  
1019 vRNA-like or **(B)** cRNA-like template of the *Firefly* luciferase. The negative control was transfected with an empty vector instead  
1020 of PB2. 4 h later the transfection solution was replaced with medium containing 25 mM glucose and the indicated concentrations  
1021 of 2-DG for another 20 h. Subsequently, cells were lysed and the n-fold of relative light units (RLU) was measured via luciferase  
1022 assay and normalized to the water control. Additionally, all values were normalized to their respective transfection control.  
1023 Statistical significances were determined via unpaired one-way ANOVA and Dunnett's correction, comparing all other samples to  
1024 the water control. p-values are indicated as follows:  $< 0.05 = *$ ,  $< 0.01 = **$ ,  $< 0.001 = ***$ ,  $< 0.0001 = ****$ .

1025 **Fig 6: Metabolic alterations induced by IAV infection and glycolytic treatment.** A549 cells were mock-infected or infected  
1026 with SC35M at an MOI of 0.001 and were subsequently incubated in DMEM (containing 25 mM glucose) with or without 10 mM  
1027 2-DG and 1 mM mannose as indicated. 24 hpi metabolic activity was quenched and intracellular metabolites were relatively  
1028 quantified via HILIC-MS/MS. All values have been normalized to the uninfected and untreated control (left column). Darker shades  
1029 of blue indicate a higher and darker shades of red indicate a lower n-fold of the respective metabolite compared to the control.  
1030 Black indicates increases higher than 5-fold compared to the control. Depicted are the means of three independent experiments  
1031 with three biological replicates per condition and experiment. Statistical significances were determined via ordinary two-way  
1032 ANOVA and Dunnett's correction, comparing all samples to their respective uninfected and untreated control. The n-folds and  
1033 p-values are presented in **Table S1**.

1034 **Fig 7: Mannose counteracts 2-DG by refueling glycolysis. (A)** The metabolic pathways of glycolysis and N-linked glycosylation  
1035 are closely connected via mannose-6-phosphate isomerase (MPI). Other enzymes depicted here are hexokinase (HK),  
1036 glucose-6-phosphate isomerase (GPI), and phosphomannomutase 2 (PMM2). **(B-D)** 24 h after seeding, A549 cells were infected  
1037 with SC35M at an MOI of **(B)** 0.001 or **(C+D)** 5 for 30 min and were incubated with 25 mM glucose and the indicated concentrations  
1038 of 2-DG, mannose, and the mannose-6 phosphate isomerase inhibitor MLS0315771 (MLS) for a total of **(B)** 24 h or **(C+D)** 8 h.  
1039 Subsequently, **(B)** supernatants were collected to determine viral titers via plaque assay or **(C+D)** cells were lysed, their RNA  
1040 isolated and cDNA synthesized using either **(C)** fluA uni12 primers to transcribe vRNA or **(D)** oligo(dT) primers to transcribe  
1041 mRNA. Real-time qPCR was performed with two technical replicates per sample and values of treated samples were normalized  
1042 to the untreated control. In case of mRNA detection all results were additionally normalized to a GAPDH control. Depicted are the  
1043 means  $\pm$  SD of three independent experiments with three biological replicates per condition and experiment. Statistical  
1044

1045 significances were determined via unpaired one-way ANOVA and Dunnett's correction, comparing all treated samples to the  
1046 untreated control. p-values are indicated as follows: < 0.05 = \*, < 0.01 = \*\*, < 0.001 = \*\*\*, < 0.0001 = \*\*\*\*.

1047 **Fig S1: Effects of 2-DG on IAV propagation, cell growth and immune induction.** 24 h after seeding, A549 cells were infected  
1048 with SC35M at an MOI of (A+B) 0.01 or (C+D) 0.001 for 30 min and incubated in the presence of the indicated concentrations of  
1049 2-DG or its solvent water for 24 h. Subsequently, cells were (A+B) stained with an NP antibody and a live/dead marker and  
1050 analyzed via flow cytometry or (C+D) detached to assess the number of living cells as well as the viability via trypan blue exclusion  
1051 in an automated cell counter. (E-H) Uninfected cells were transfected with cellular or viral RNA and treated with the indicated 2-  
1052 DG concentrations for 6 h. Subsequently, cells were lysed, their RNA isolated and cDNA synthesized using oligo(dT) primers to  
1053 transcribe mRNA. Real-time qPCR was performed with two technical replicates per sample and values of all other samples were  
1054 normalized to the unstimulated water control. Additionally, all results were normalized to a GAPDH control. (A-H) Depicted are  
1055 the means  $\pm$  SD of three independent experiments with three biological replicates per condition and experiment. Statistical  
1056 significances were determined via (A, C, D) unpaired one-way ANOVA and Dunnett's correction, comparing all treated samples  
1057 to the water control or (B, E-H) ordinary two-way ANOVA with Dunnett's correction, comparing all treated samples of both groups  
1058 to their respective water control. p-values are indicated as follows: < 0.05 = \*, < 0.01 = \*\*, < 0.001 = \*\*\*, < 0.0001 = \*\*\*\*.

1059 **Fig S2: Effects of 2-DG on human primary cells and IAV propagation.** (A) Human lung explants were infected with  $2 \times 10^5$   
1060 SC35M particles for 30 min. Afterwards they were incubated with 11.1 mM glucose and the indicated concentrations of 2-DG and  
1061 supernatants were collected 1, 24 and 48 hpi to determine viral titers via plaque assay. (B-I) After reaching  $\approx$  90 % confluency (B)  
1062 uninfected HBEpCs were treated with the indicated concentrations of 2-DG or its solvent water for 24 h. Afterwards the  
1063 supernatants were used to perform LDH assays to determine the relative cytotoxicity of the treatment. (C-I) HBEpCs were infected  
1064 with SC35M at an MOI of (C) 1, (D, F, H) 0.01 or (E, G, I) 5 for 30 min and were incubated with 6 mM glucose and the indicated  
1065 concentrations of 2-DG for a total of (D, F, H) 24 h or (E, G, I) 8 h. Subsequently, (C-E) supernatants were used to (C) perform  
1066 lactate assays in order to indirectly assess the glycolytic activity and (D+E) determine viral titers via plaque assay. (F-I)  
1067 Additionally, cells were lysed, their RNA isolated and cDNA synthesized using either (F+H) oligo(dT) primers to transcribe mRNA  
1068 or (H+I) fluA uni12 primers to transcribe vRNA. Real-time qPCR was performed with two technical replicates per sample and  
1069 values of treated samples were normalized to the water control. In case of mRNA detection, all results were additionally normalized  
1070 to a GAPDH control. Depicted are the means  $\pm$  SD of three independent experiments with three biological replicates per condition  
1071 and experiment. Statistical significances were determined via (A-C) ordinary two-way ANOVA and Dunnett's correction,  
1072 comparing each treated sample to its respective water control. (D-I) Other significances were determined via unpaired one-way  
1073 ANOVA and Dunnett's correction, comparing all treated samples to the water control. p-values are indicated as follows: < 0.05 =  
1074 \*, < 0.01 = \*\*, < 0.001 = \*\*\*, < 0.0001 = \*\*\*\*.

1075 **Fig S3: Impairment of IAV replication by 2-DG is not strain-specific.** 24 h after seeding, A549 cells were infected with Pan/99  
1076 at the depicted MOIs for 30 min and were incubated with the indicated concentrations of 2-DG or its solvent water for a total of  
1077 (A-C) 24 h or (D+E) 8 h. Subsequently, (A) supernatants were collected to determine viral titers via plaque assay or (B-E) cells  
1078 were lysed, their RNA isolated and cDNA synthesized using either (B+D) oligo(dT) primers to transcribe mRNA or (C+E) fluA  
1079 uni12 primers to transcribe vRNA. Real-time qPCR was performed with two technical replicates per sample and values of treated  
1080 samples were normalized to the water control. In case of mRNA detection, all results were additionally normalized to a GAPDH  
1081 control. Depicted are the means  $\pm$  SD of three independent experiments with three biological replicates per condition and  
1082 experiment. Statistical significances were determined via unpaired one-way ANOVA and Dunnett's correction, comparing all  
1083 treated samples to the water control. p-values are indicated as follows: < 0.05 = \*, < 0.01 = \*\*, < 0.001 = \*\*\*, < 0.0001 = \*\*\*\*.

1084 **Fig S4: 2-DG does not impair IAV vRNA durability.** 24 h after seeding, HEK293T cells were transfected with plasmids containing  
1085 the SC35M sequences of PA, PB1, PB2 and NP. 4 h later the transfection solution was replaced with fresh medium for another  
1086 20 h. Subsequently, cells were infected with SC35M at an MOI of 5 for 30 min and were incubated with the indicated  
1087 concentrations of 2-DG and 100  $\mu$ g/mL cycloheximide. A negative control was previously transfected with an empty vector instead  
1088 of PA while a positive control was not treated with cycloheximide. 6 hpi, cells were lysed, their RNA isolated and cDNA synthesized  
1089 using specific primers to transcribe vRNA of the SC35M gene segment 6 (NA). Real-time qPCR was performed with two technical  
1090 replicates per sample. Statistical significances were determined via unpaired one-way ANOVA and Dunnett's correction,  
1091 comparing all other samples to the water control. p-values are indicated as follows: < 0.05 = \*, < 0.01 = \*\*, < 0.001 = \*\*\*, < 0.0001  
1092 = \*\*\*\*.

1093 **Fig S5: Effects of mannose, MLS0315771, and pyruvate on IAV propagation and A549 cells.** 24 h after seeding, A549 cells  
1094 were infected with SC35M at an MOI of 0.001 or for 30 min and incubated in the presence of the indicated concentrations of  
1095 metabolites and inhibitors or their solvents for a total of 24 h. Subsequently, (A, D-F) supernatants were collected to determine  
1096 (A, E, F) viral titers via plaque assay and (D) extracellular lactate concentrations via lactate assay or (B+C) cells were detached  
1097 to assess the number of living cells and the viability via trypan blue exclusion and an automated cell counter. Depicted are the  
1098 means  $\pm$  SD of three independent experiments with three biological replicates per condition and experiment. Statistical  
1099 significances were determined via unpaired one-way ANOVA and Dunnett's correction, comparing (B-E) all treated samples to  
1100 the DMSO control or (A+F) all other samples to the 2-DG-treated sample (white bar). p-values are indicated as follows: < 0.05 =  
1101 \*, < 0.01 = \*\*, < 0.001 = \*\*\*, < 0.0001 = \*\*\*\*.

1102 **Fig S6: Gating strategy for the quantification of uninfected versus infected and living versus dead cells.** A549 cells were  
1103 infected with SC35M at an MOI of 0.01. Directly after the infection, cells were mock-treated or treated with 2-DG. 24 hpi cells were  
1104 stained with a viability dye and an NP antibody and were quantified via flow cytometry. At first cells were pre-gated according to  
1105 their FSC/SSC appearance. Then these cells were sub-classified to discriminate between uninfected and infected cells as well as  
1106 living and dead cells. Representative dot plots are depicted to exemplify the gating strategy used for data analysis in Fig S1A+B.

1107 **Table S1: n-fold changes over control and statistical significances of Fig 6.**

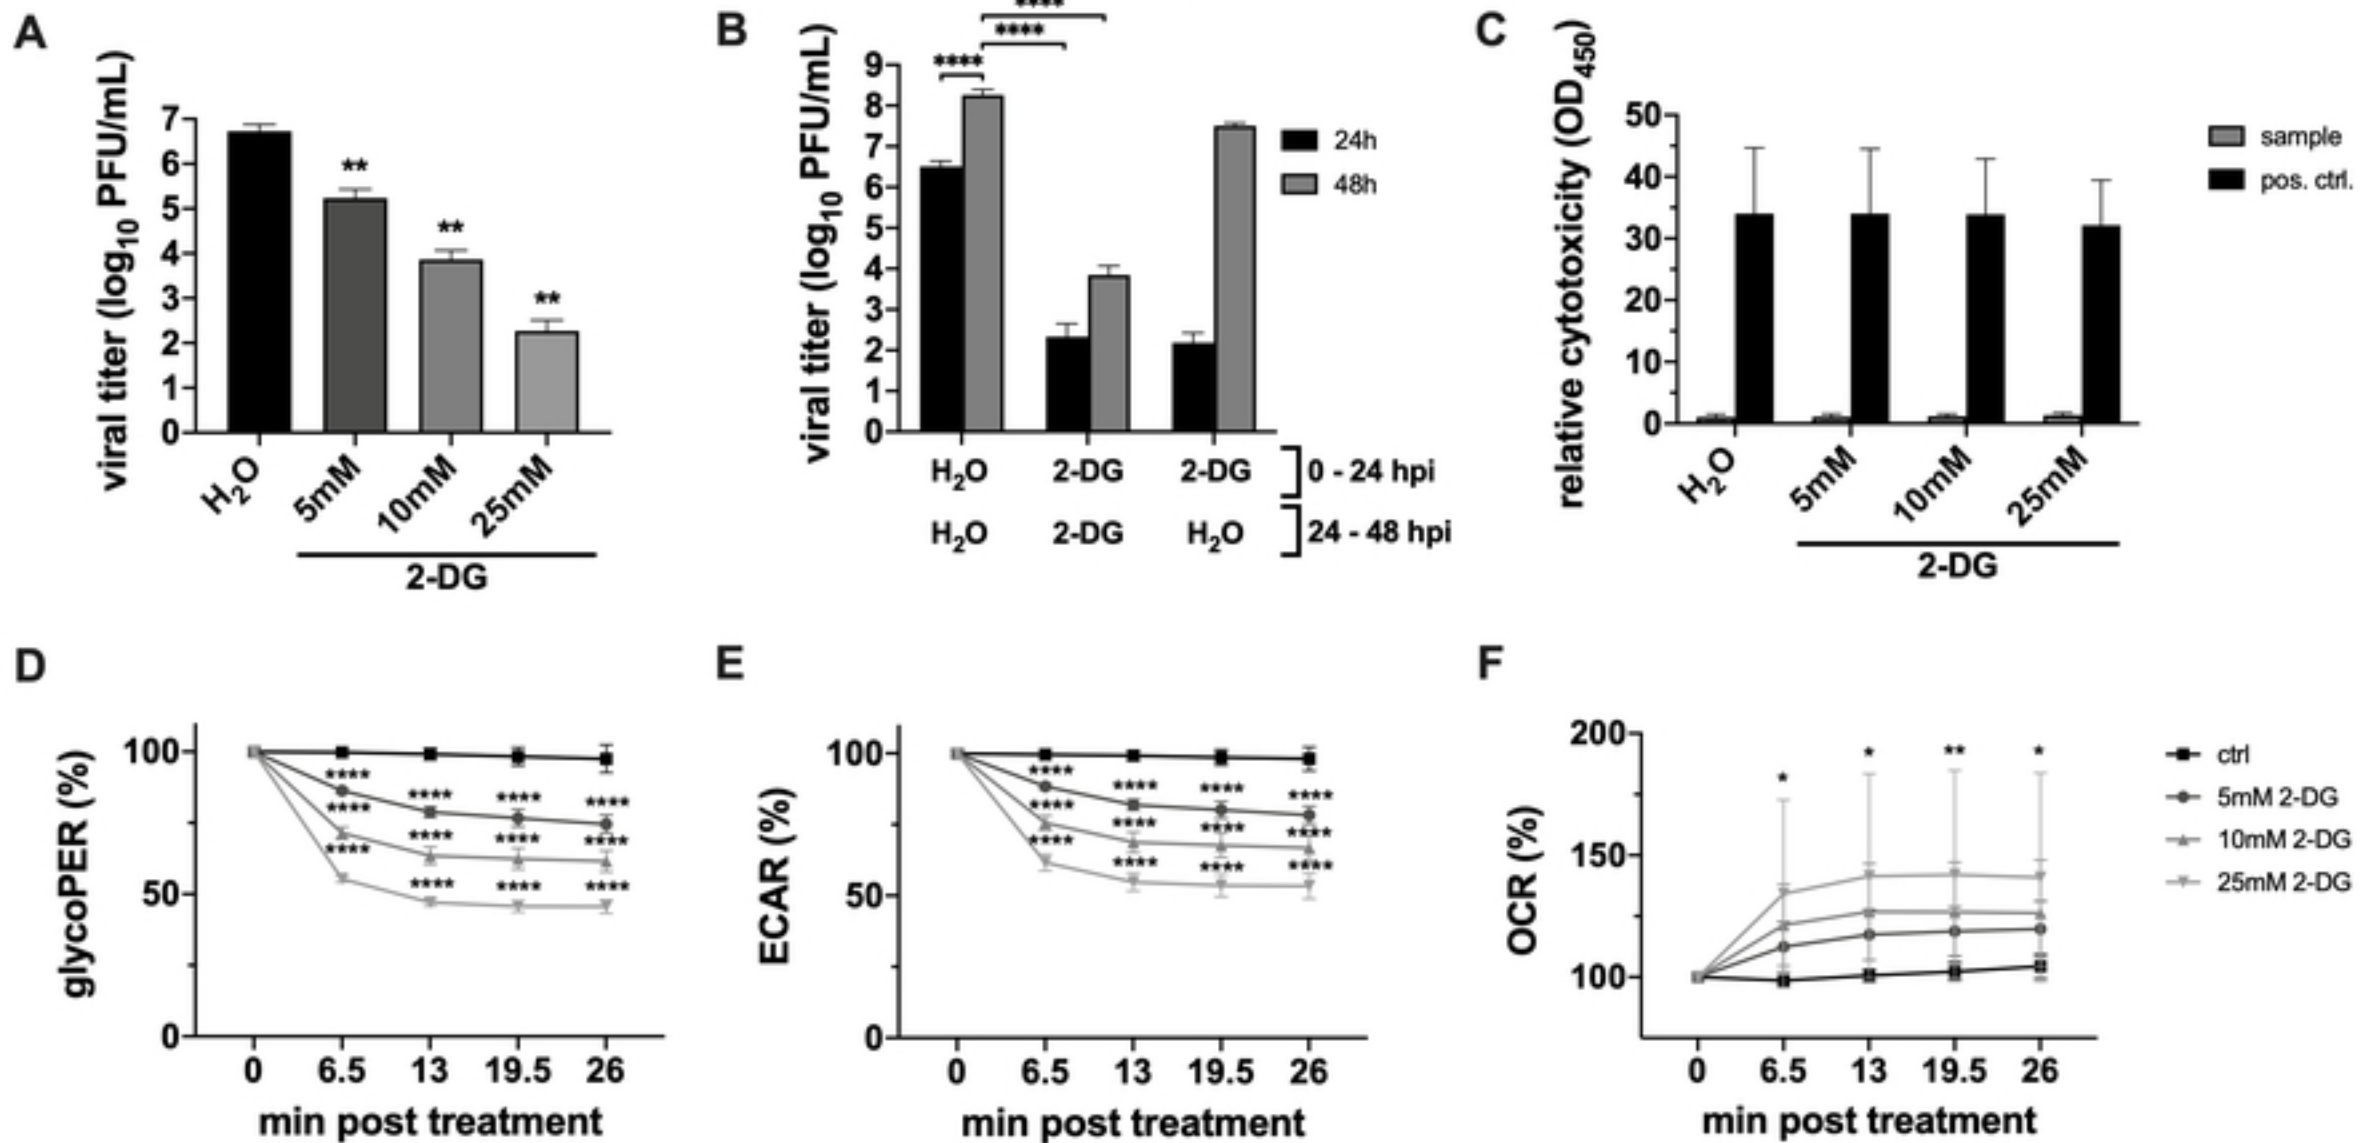

Fig 1

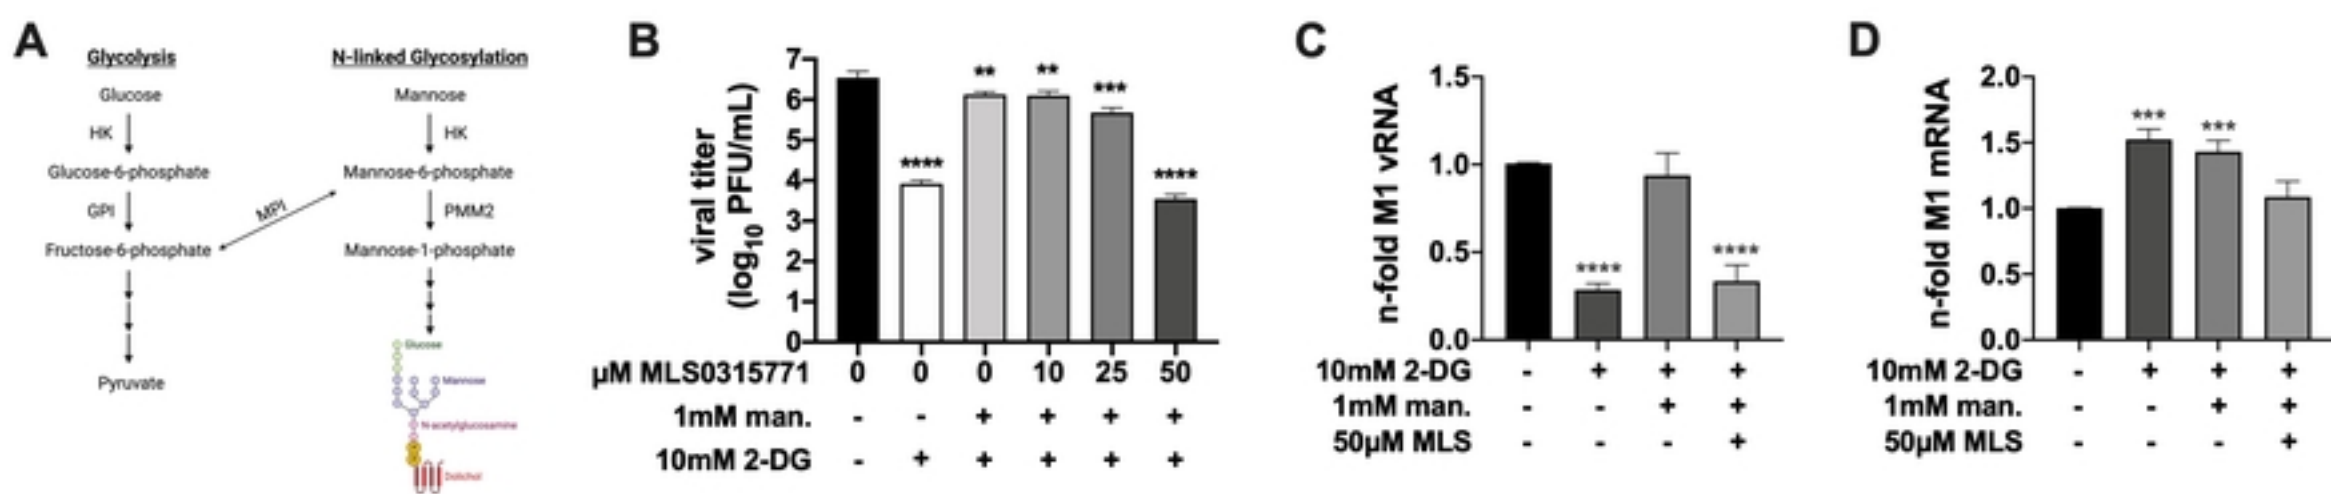

Fig 7

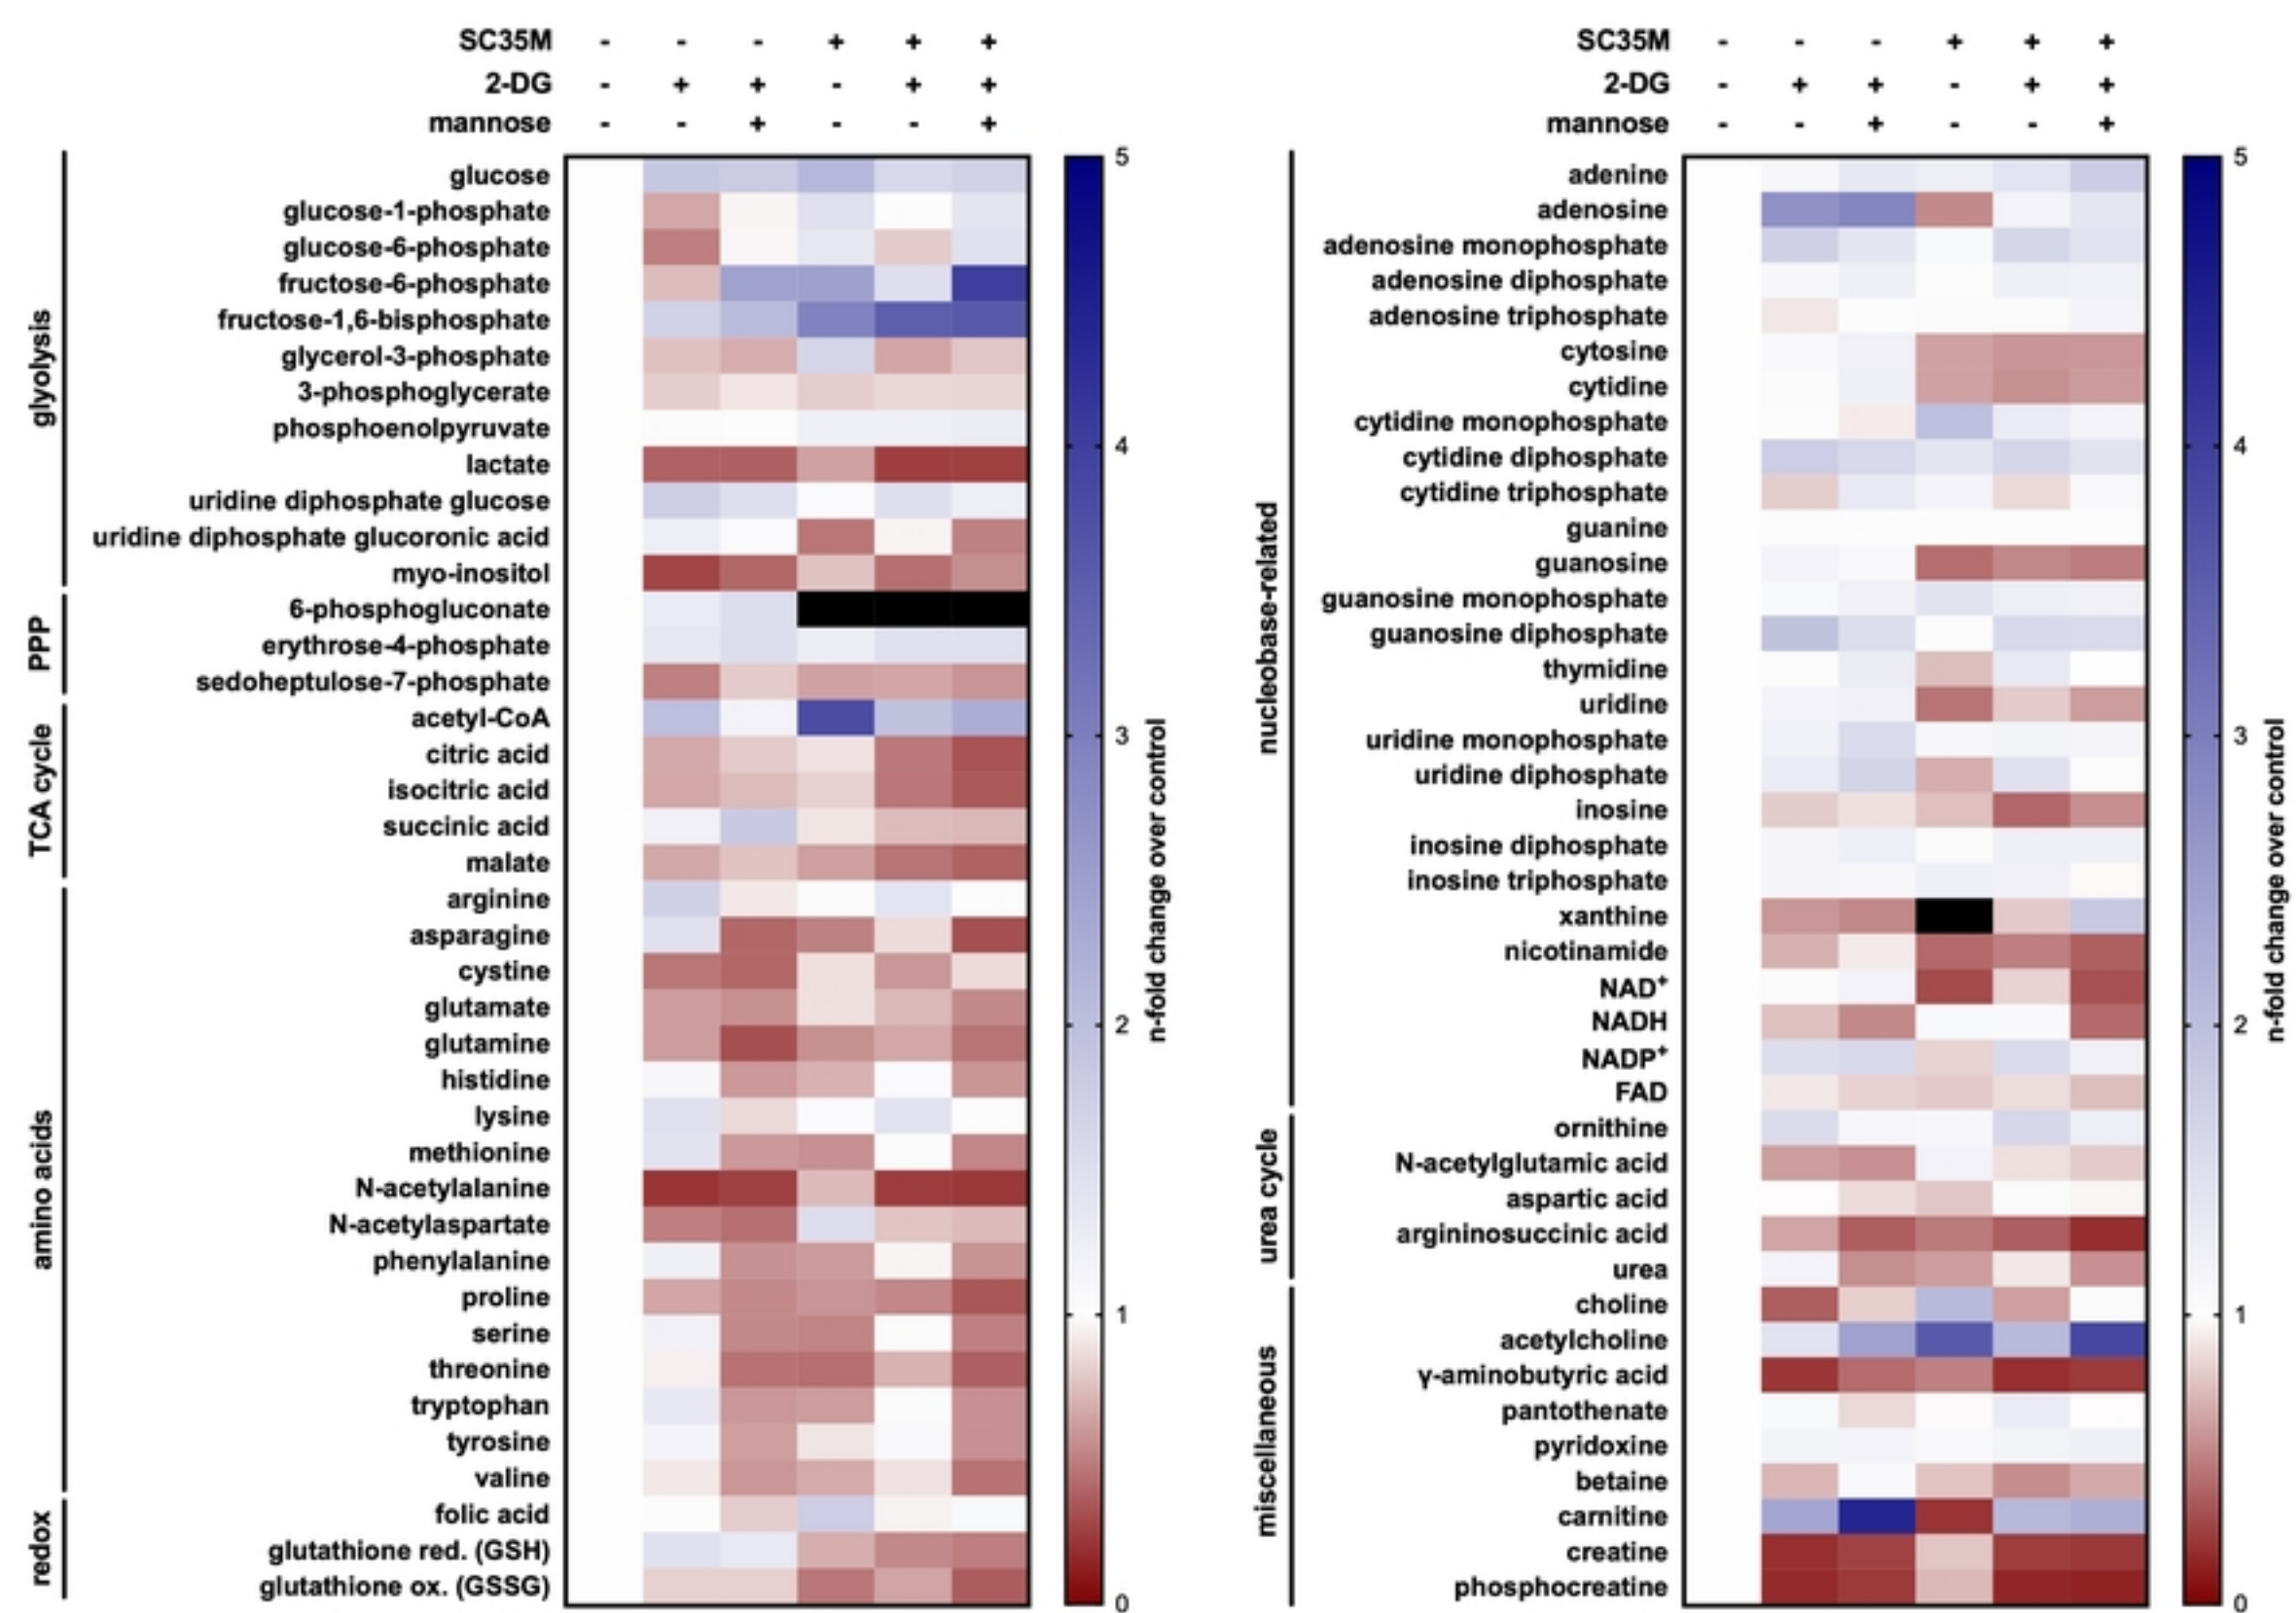

Fig 6

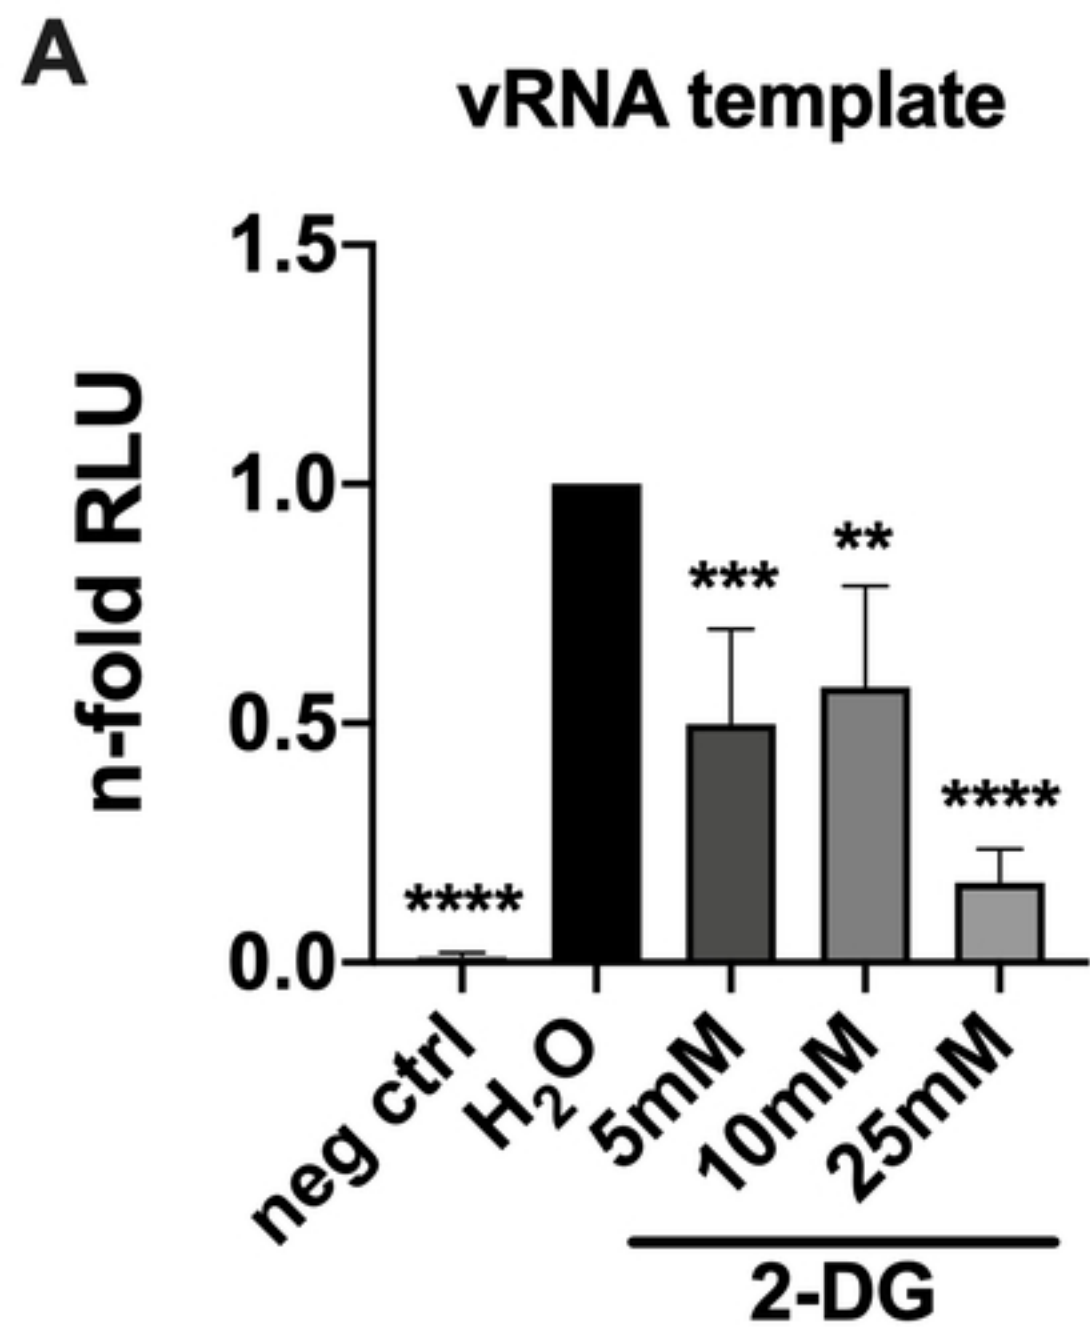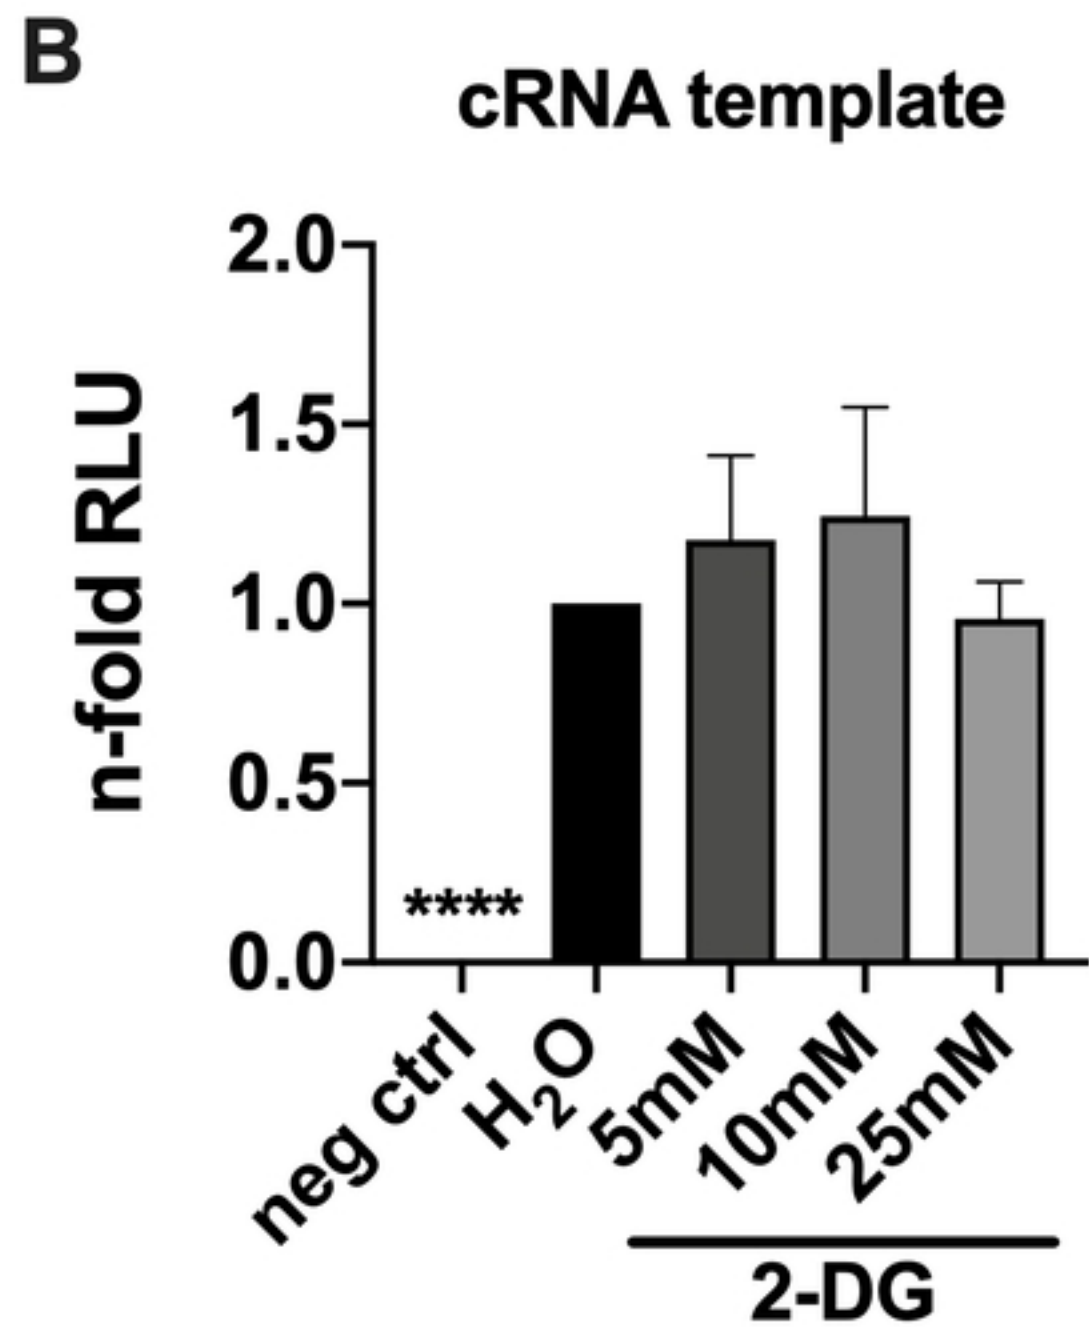

Fig 5



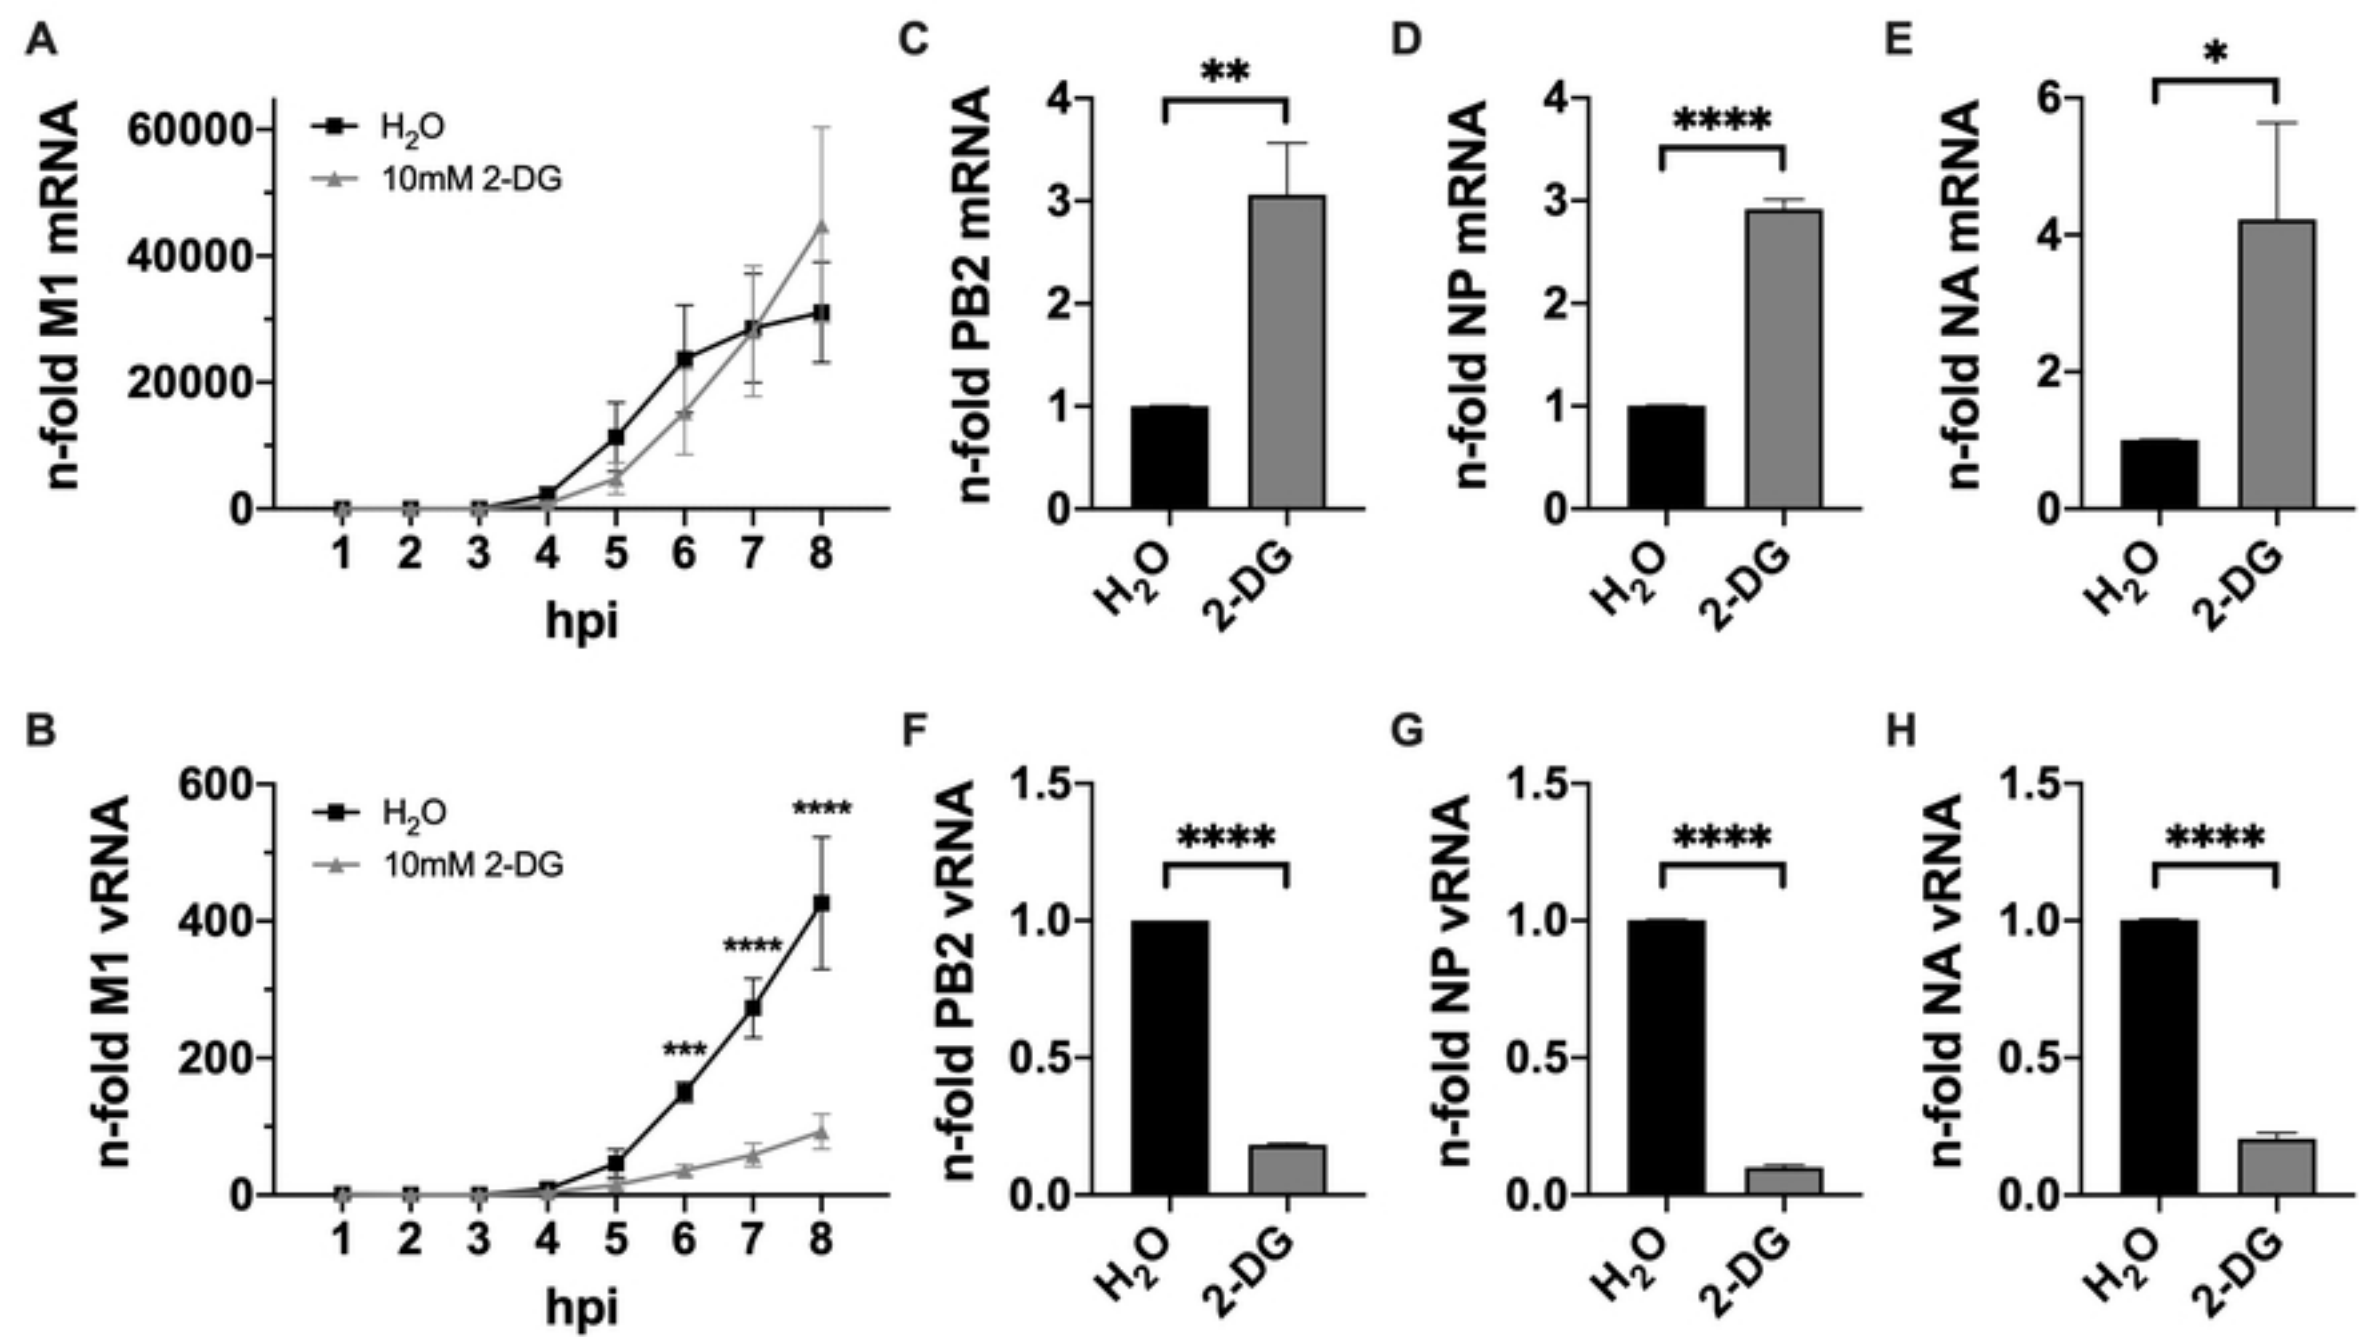

Fig 4

24h, MOI = 0.001

8h, MOI = 5

**A**

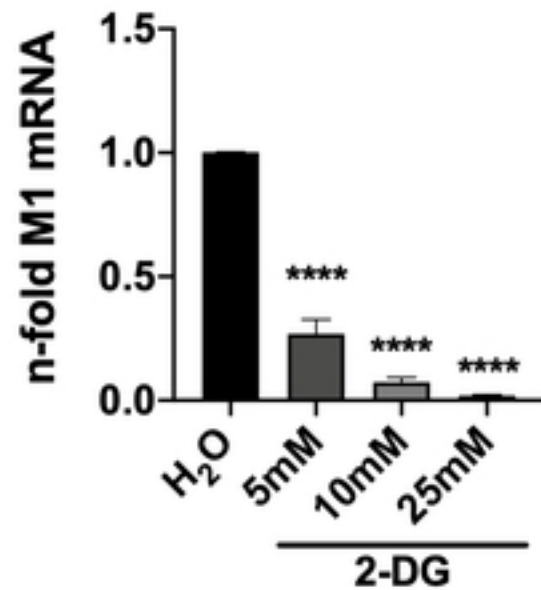

**B**

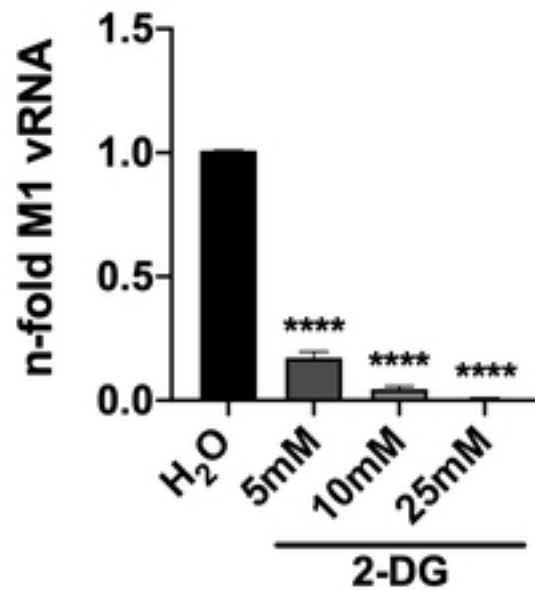

**C**

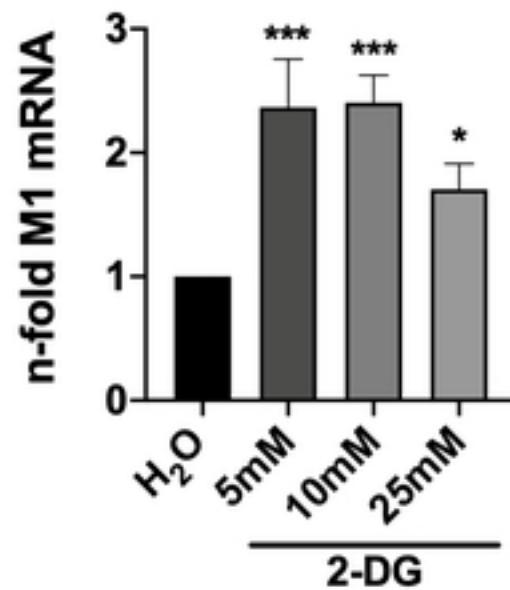

**D**

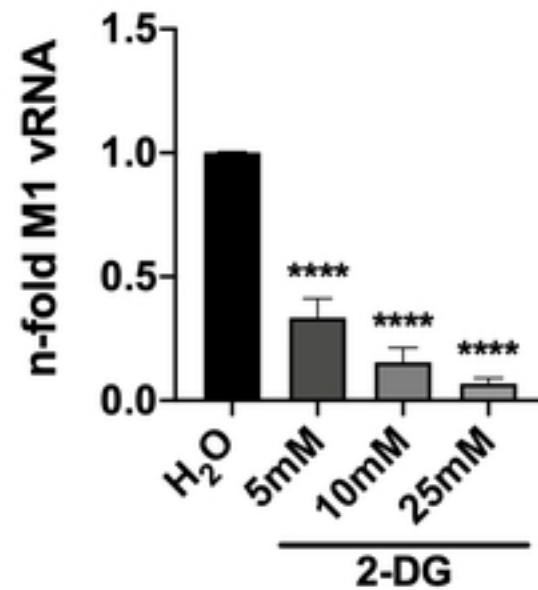

Fig 3

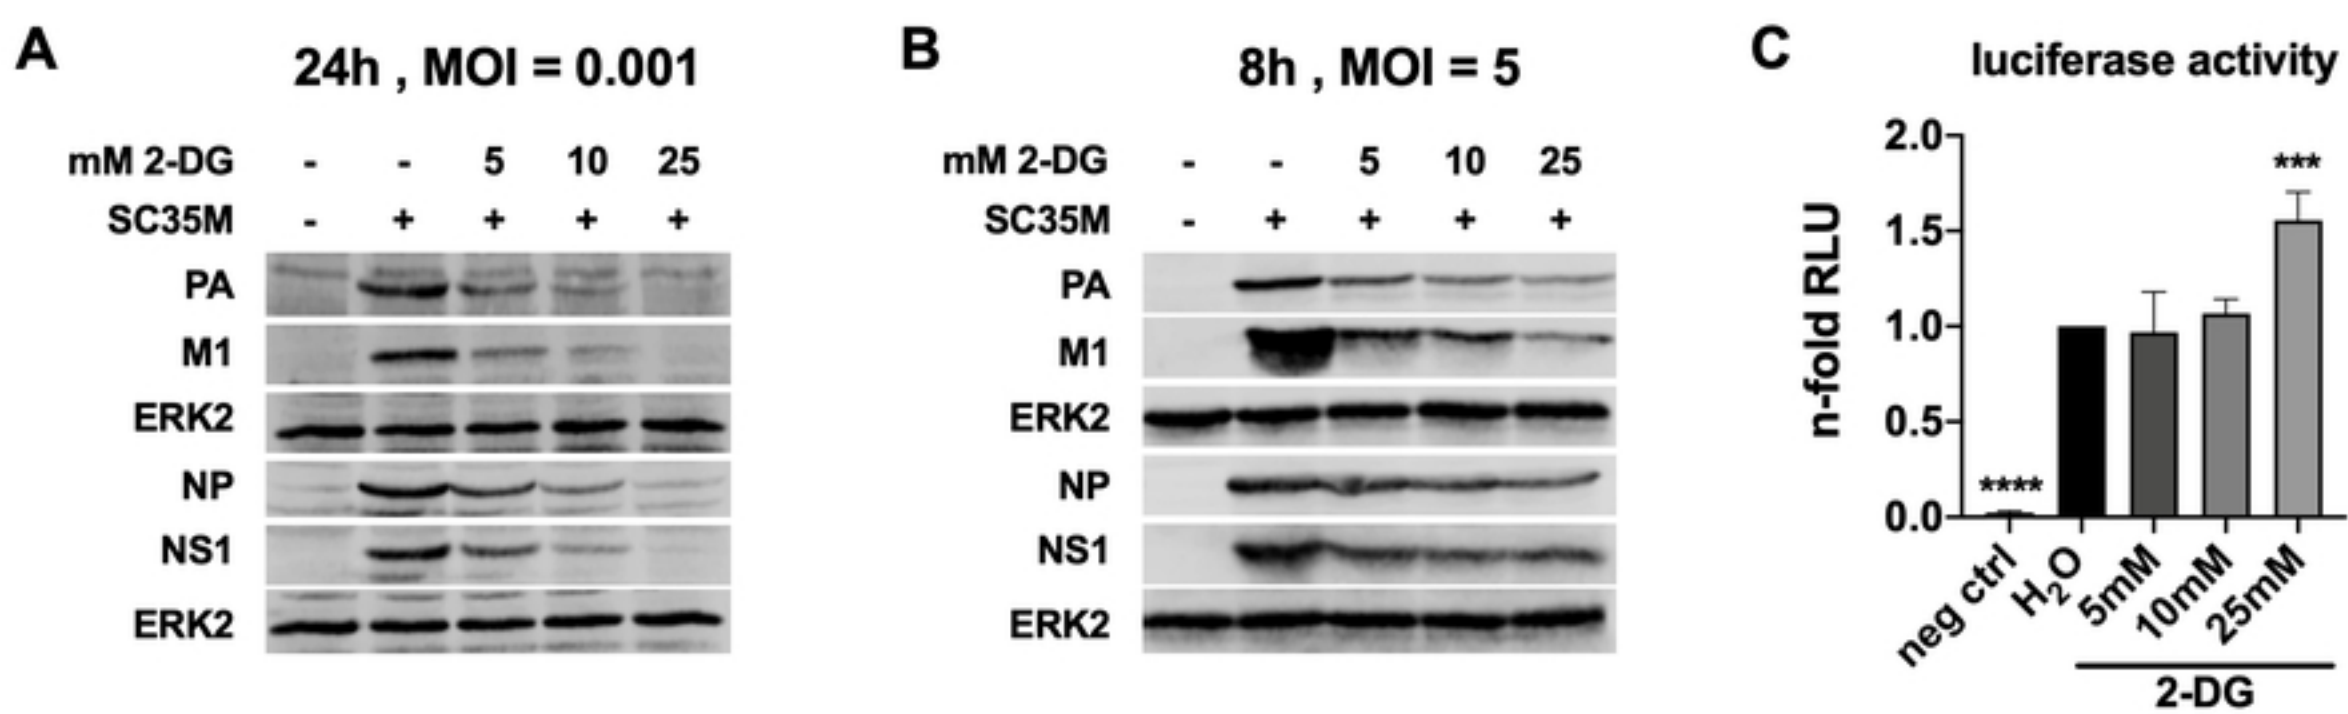

Fig 2
